# Supplementary material for: Nonaromatic naphthocorroles
Source: Royal Society of Chemistry journal article supplement (doi:10.1039/d3cc01083j), 2023-01-01
Supplement: d3cc01083j1.pdf [file d3cc01083j1.pdf]

**Supporting Information  
for**

**Nonaromatic naphthocorroles**

Łukasz Kielesiński,<sup>a</sup> Francesco F. Summa,<sup>b</sup> Jeanet Conradie,<sup>cf</sup> Hilah C. Honig,<sup>de</sup> Ariel Freidman,<sup>de</sup> Guglielmo Monaco,<sup>\*b</sup> Lior Elbaz,<sup>\*de</sup> Abhik Ghosh,<sup>\*f</sup> and Daniel T. Gryko<sup>\*a</sup>

<sup>a</sup>*Institute of Organic Chemistry of Polish Academy of Sciences, Kasprzaka 44/52, 01-224 Warsaw, Poland. E-mail: dtgryko@icho.edu.pl*

<sup>b</sup>*Department of Chemistry and Biology "A. Zambelli", Via G. Paolo II, 132, Fisciano, SA 84124, Italy. E-mail: gmonaco@unisa.it*

<sup>c</sup>*Department of Chemistry, University of the Free State, 9300 Bloemfontein, Republic of South Africa. E-mail: conradj@ufs.ac.za*

<sup>d</sup>*Chemistry Department, Bar-Ilan University, Ramat-Gan 5290002, Israel*

<sup>e</sup>*Bar-Ilan Center for Nanotechnology and Advanced Materials, Bar-Ilan University, Ramat-Gan 5290002, Israel. E-mail: lior.elbaz@biu.ac.il*

<sup>f</sup>*Department of Chemistry, University of Tromsø, N-9037 Tromsø, Norway; E-mail: abhik.ghosh@uit.no*

**Table of Contents**

|                           |     |
|---------------------------|-----|
| 1. General information    | S2  |
| 2. Synthesis              | S2  |
| 3. Crystallographic data  | S6  |
| 4. Experimental methods   | S8  |
| 5. Spectroscopic data     | S8  |
| 6. Computational results  | S11 |
| 7. Electrochemical data   | S15 |
| 8. NMR Spectra            | S18 |
| 9. Cartesian coordinates  | S29 |
| 10. Additional references | S37 |

## 1. General Information

All reported NMR spectra ( $^1\text{H}$ ,  $^{13}\text{C}$  and  $^{19}\text{F}$  NMR) were recorded using a Varian 500 and 600 or Bruker 500 spectrometers. Chemical shifts ( $\delta$  ppm) were determined with TMS as the internal reference,  $J$  values are given in Hz. The  $^1\text{H}$  NMR spectrum of pure deuterated THF (page 27) shows additional signals at around 2.5 and 11 ppm, which are observed in some NMR spectra registered in THF- $d_8$ . High resolution mass spectra (HRMS) were obtained via electron ionization (EI) source and an EBE double focusing geometry mass analyzer or spectrometer equipped with electrospray ion source with q-TOF type mass analyzer (ESI) or by atmospheric pressure chemical ionization (APCI). Chromatography was performed on silica gel 60 (230-400 mesh) and thin layer chromatography was performed on TLC plates (Merck, silica gel 60 F<sub>254</sub>).

## 2. Synthesis

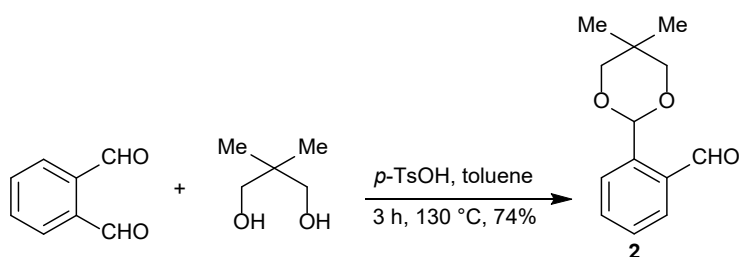

**Scheme S1.** Synthesis of 2-(5,5-dimethyl-1,3-dioxan-2-yl)benzaldehyde (**2**).

**Synthesis of 2-(5,5-dimethyl-1,3-dioxan-2-yl)benzaldehyde (**2**).** Round bottom flask was charged with phthalaldehyde (5.45 g, 41.0 mmol), 2,2-dimethylpropane-1,3-diol (4.25 g, 41.0 mmol) and  $p\text{-TsOH}$  (0.025 g, 0.15 mmol). Following next, toluene was added (60 ml) and the reaction mixture was stirred at 130 °C (oil bath) for 3 h with Dean-Stark trap. After this time, the mixture was cooled to room temperature and the solvent was evaporated. Crude product was purified by column chromatography (silica, hexane/ethyl acetate 4:1) to afford product of analytical purity.

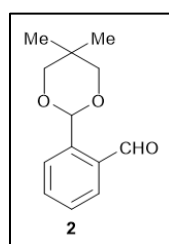

**2-(5,5-dimethyl-1,3-dioxan-2-yl)benzaldehyde (**2**).** Yellowish oil. Yield: 6.66 g (74%).  $^1\text{H}$  NMR ( $\text{CDCl}_3$ , 500 MHz):  $\delta$  10.43 (s, 1H, CHO) 7.90 (d,  $J = 7.6$  Hz, 1H, Ar), 7.80 (d,  $J = 7.7$  Hz, 1H, Ar), 7.61 (t,  $J = 7.2$  Hz, 1H, Ar), 7.51 (t,  $J = 7.5$  Hz, 1H, Ar), 6.02 (s, 1H, CH), 3.80 (d,  $J = 11.1$  Hz, 2H,  $\text{CH}_2$ ), 3.73 (d,  $J = 11.0$  Hz, 2H,  $\text{CH}_2$ ), 1.31 (s, 3H,  $\text{CH}_3$ ), 0.82 (s, 3H,  $\text{CH}_3$ ).  $^{13}\text{C}$  NMR ( $\text{CDCl}_3$ , 125 MHz):  $\delta$  192.1, 139.4, 133.7, 133.6, 130.2, 129.2, 127.2, 99.3, 78.0, 30.2, 23.4, 21.9. HRMS (EI):  $m/z$  calculated for  $\text{C}_{13}\text{H}_{16}\text{O}_3$ : 220.1099 [ $M^+$ ]; found:

220.1095.

**General procedure for the synthesis of corroles 3a-d.** Dipyrromethane (**1a-d**) (2.0 mmol) and 2-(5,5-dimethyl-1,3-dioxan-2-yl)benzaldehyde (**2**) (1.0 mmol) were dissolved in MeOH (100 ml). Subsequently, solution of  $\text{HCl}_{\text{aq}}$  (36%, 5 ml in 100 ml of  $\text{H}_2\text{O}$ ) was added and the reaction mixture was stirred at room temperature for 1 h. Then, the mixture was extracted by  $\text{CHCl}_3$ . The combined organic layers were dried over  $\text{Na}_2\text{SO}_4$ , filtered and diluted to 500 ml with  $\text{CHCl}_3$ . DDQ (3.0 mmol) in toluene (6 ml) was added and the reaction mixture was stirred at room temperature for 15 minutes. The reaction mixture was concentrated to one-third of the initial volume and passed over by short silica column (DCM) and all fractions containing corrole were combined and evaporated. Further purification details are given below.

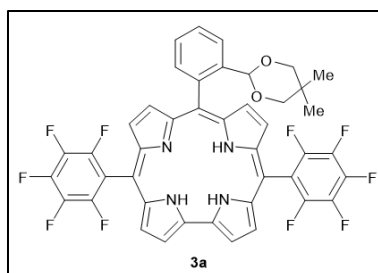

**10-(2-(5,5-dimethyl-1,3-dioxan-2-yl)phenyl)-5,15-bis(pentafluorophenyl)corrole (3a).**

Crude product was purified by column chromatography (silica, DCM/hexane 2:1) and crystallized from hot MeOH to afford product of analytical purity. Violet precipitate. Yield: 0.204 g (25%). M.p. 178-180 °C. <sup>1</sup>H NMR (CDCl<sub>3</sub>, 600 MHz): δ 9.11 (d, *J* = 4.2 Hz, 2H, β-H), 8.66 (d, *J* = 4.6 Hz, 2H, β-H), 8.61-8.52 (m, 4H, β-H), 8.21 (dd, *J* = 8.1, 1.2 Hz, 1H, Ar), 7.93 (dd, *J* = 7.5, 0.9 Hz 1H, Ar),

7.87 (td, *J* = 7.9, 1.2 Hz, 1H, Ar), 7.67 (td, *J* = 7.5, 1.4 Hz, 1H, Ar), 4.88 (s, 1H, CH), 3.32 (d, *J* = 11.6 Hz, 2H, CH<sub>2</sub>), 2.49 (d, *J* = 11.2 Hz, 2H, CH<sub>2</sub>), 1.23 (s, 3H, CH<sub>3</sub>), 0.21 (s, 3H, CH<sub>3</sub>). Signals from the inner NH groups were not visible. <sup>19</sup>F NMR (CDCl<sub>3</sub>, 470 MHz): δ -162.20 – -161.45 (m, 4F, Ar), -153.10 – -152.50 (m, 2F, Ar), -138.12 (d, *J* = 20.6 Hz, 2F, Ar), -137.84 (d, *J* = 20.2 Hz, 2F, Ar). HRMS (ESI): *m/z* calculated for C<sub>43</sub>H<sub>27</sub>F<sub>10</sub>N<sub>4</sub>O<sub>2</sub>: 821.1974 [*M*+H<sup>+</sup>]; found: 821.1971.

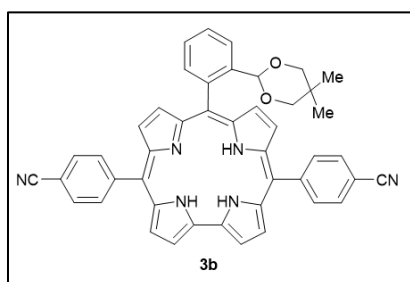

**10-(2-(5,5-dimethyl-1,3-dioxan-2-yl)phenyl)-5,15-bis(4-cyanophenyl)corrole (3b).**

Crude product was purified by column chromatography (silica, DCM/hexane 95:5) and crystallized from DCM-cyclohexane to afford product of analytical purity. Violet precipitate. Yield: 0.258 g (37%). M.p. 250 °C (decomp). <sup>1</sup>H NMR (CDCl<sub>3</sub>, 500 MHz): δ 9.05 (bs, 2H, β-H), 8.81 (bs, 2H, β-H), 8.60 (bs, 2H, β-H), 8.49 (bs, 6H, β-H+Ar), 8.21 (bs, 1H, Ar), 8.12 (bs, 4H, Ar), 7.88

(bs, 2H, Ar), 7.67 (bs, 1H, Ar), 4.93 (s, 1H, CH), 3.31 (bs, 2H, CH<sub>2</sub>), 2.51 (bs, 2H, CH<sub>2</sub>), 1.23 (s, 3H, CH<sub>3</sub>), 0.21 (s, 3H, CH<sub>3</sub>), -2.32 (bs, 3H, NH). Some signals in the <sup>13</sup>C NMR spectrum overlap. <sup>13</sup>C NMR (CDCl<sub>3</sub>, 125 MHz): δ 144.2, 144.1, 139.2, 135.6, 135.4, 134.3, 131.9, 129.3, 129.1, 127.4, 127.3, 126.2, 119.2, 117.1, 111.2, 110.0, 108.0, 100.0, 29.8, 26.7, 23.1, 21.3. HRMS (APCI): *m/z* calculated for C<sub>45</sub>H<sub>33</sub>N<sub>6</sub>O<sub>2</sub>: 689.2665 [*M*-H<sup>+</sup>]; found: 689.2666.

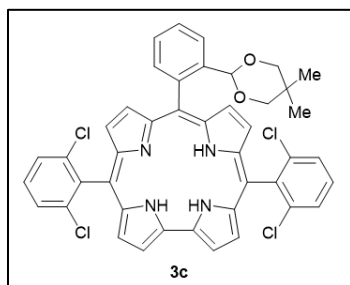

**10-(2-(5,5-dimethyl-1,3-dioxan-2-yl)phenyl)-5,15-bis(2,6-dichlorophenyl)corrole (3c).**

Crude product was purified by column chromatography (silica, DCM/hexane 2:1) and crystallized from DCM-cyclohexane to afford product of analytical purity. Violet precipitate. Yield: 0.216 g (28%). M.p. 215 °C (decomp). <sup>1</sup>H NMR (CDCl<sub>3</sub>, 500 MHz): δ 8.97 (d, *J* = 3.9 Hz, 2H, β-H), 8.47 (d, *J* = 4.5 Hz, 2H, β-H), 8.43 (d, *J* = 4.5 Hz, 2H, β-H), 8.40 (d, *J* = 3.4 Hz, 2H, β-H), 8.17 (d, *J* = 7.6 Hz, 1H,

Ar), 7.96 (d, *J* = 7.4 Hz, 1H, Ar), 7.82 (t, *J* = 7.7 Hz, 1H, Ar), 7.77 (d, *J* = 3.3 Hz, 2H, Ar), 7.76 (d, *J* = 3.3 Hz, 2H, Ar), 7.68-7.59 (m, 3H, Ar), 4.90 (s, 1H, CH), 3.31 (d, *J* = 11.2 Hz, 2H, CH<sub>2</sub>), 2.50 (d, *J* = 11.2 Hz, 2H, CH<sub>2</sub>), 1.22 (s, 3H, CH<sub>3</sub>), 0.20 (s, 3H, CH<sub>3</sub>), -2.19 (bs, 3H, NH). Signals at around 1.43 and 0.97-0.86 originate from residual cyclohexane and hexane, respectively. <sup>13</sup>C NMR (CDCl<sub>3</sub>, 125 MHz): δ 140.2, 139.4, 138.6, 138.4, 137.2, 134.4, 130.4, 128.9, 128.13, 128.07, 127.5, 127.3, 126.0, 125.8, 125.7, 116.2, 108.0, 100.1, 29.8, 29.7, 24.1, 23.2, 21.3. Signals at around 31.9, 26.9, 22.7 and 14.1 originate from residual cyclohexane and hexane. HRMS (EI): *m/z* calculated for C<sub>43</sub>H<sub>32</sub>Cl<sub>4</sub>N<sub>4</sub>O<sub>2</sub>: 776.1279 [*M*<sup>+</sup>]; found: 776.1257.

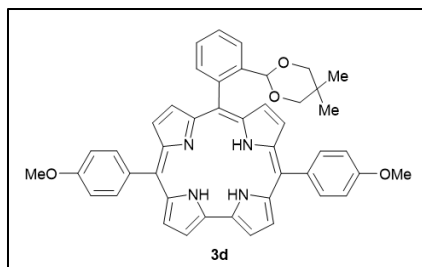

**10-(2-(5,5-dimethyl-1,3-dioxan-2-yl)phenyl)-5,15-bis(4-methoxyphenyl)corrole (3d).** Crude product was purified by column chromatography (silica, DCM/hexane 95:5) and crystallized from hot MeOH to afford product of analytical purity. Violet precipitate. Yield: 0.176 g (25%). M.p. 244 °C (decomp). <sup>1</sup>H NMR (CDCl<sub>3</sub>, 600 MHz): δ 8.90 (bs, 2H, β-H), 8.82 (bs, 2H, β-H), 8.54 (bs, 2H, β-H), 8.36 (bs, 2H, β-H), 8.27 (bs, 4H, Ar), 8.21-8.13 (m, 1H, Ar), 7.94-7.87 (m, 1H, Ar), 7.86-7.79 (m, 1H, Ar), 7.67-7.60 (m, 1H, Ar), 7.40-7.27 (m, 4H, Ar), 4.94 (s, 1H, CH), 4.06 (s, 6H, OCH<sub>3</sub>), 3.31 (d, *J* = 10.5 Hz, 2H, CH<sub>2</sub>), 2.51 (d, *J* = 9.5 Hz, 2H, CH<sub>2</sub>), 1.23 (s, 3H, CH<sub>3</sub>), 0.20 (s, 3H, CH<sub>3</sub>). Signals from the inner NH groups were not visible. HRMS (EI): *m/z* calculated for C<sub>45</sub>H<sub>40</sub>N<sub>4</sub>O<sub>4</sub>: 700.3050 [*M*<sup>+</sup>]; found: 700.3070.

**General procedure for the synthesis of naphthocorroles 4a-d.** Corrole (**3a-d**) (0.12 mmol) was dissolved in acetic acid (22 ml). Subsequently, TFA (11 ml) and 5% aq solution of H<sub>2</sub>SO<sub>4</sub> (6 ml) were added and the reaction mixture was stirred at 50 °C (oil bath) for given time - **3a** - 2 h, **3b** and **3d** - 0.5 h and **3c** - 1 h under argon. Then, the mixture was cooled to room temperature, water was added, and then extracted by CHCl<sub>3</sub>. Next, saturated solution of K<sub>2</sub>CO<sub>3</sub> in water was added to the organic phase and extracted again by CHCl<sub>3</sub>. The combined organic layers were dried over Na<sub>2</sub>SO<sub>4</sub>, filtered and evaporated. Further purification details are given below.

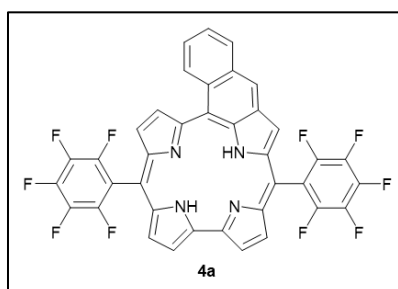

**Naphthocorrole 4a.** Crude product was purified by column chromatography (silica, DCM/hexane, 1:2) and crystallized from DCM/hexane to afford product of analytical purity. Dark precipitate. Yield: 0.038 g (44%). M.p. 315 °C (decomp). <sup>1</sup>H NMR (THF-*d*<sub>8</sub>, 500 MHz): δ 16.39 (s, 1H, NH), 15.81 (s, 1H, NH), 8.10 (d, *J* = 8.9 Hz, 1H, Ar), 8.01 (s, 1H, Ar), 7.66 (d, *J* = 8.1 Hz, 1H, Ar), 7.51 (d, *J* = 4.8 Hz, 1H, β-H), 7.26 (t, *J* = 7.8 Hz, 1H, Ar), 7.15 (t, *J* = 7.4 Hz, 1H, Ar), 6.97 (d, *J* = 4.6 Hz, 1H, β-H), 6.95-6.88 (m, 2H, Ar), 6.72-6.68 (m, 2H, Ar),

6.38-6.32 (m, 1H, Ar). <sup>19</sup>F NMR (THF-*d*<sub>8</sub>, 470 MHz): δ -163.71 – -163.52 (m, 4F, Ar), -155.76 (t, *J* = 20.6 Hz, 1F, Ar), -155.48 (t, *J* = 20.8 Hz, 1F, Ar), -140.10 (dd, *J* = 22.6, 7.0 Hz, 2F, Ar), -139.52 (dd, *J* = 22.6, 7.0 Hz, 2F, Ar). HRMS (ESI): *m/z* calculated for C<sub>38</sub>H<sub>15</sub>F<sub>10</sub>N<sub>4</sub>: 717.1137 [*M*+H<sup>+</sup>]; found: 717.1136.

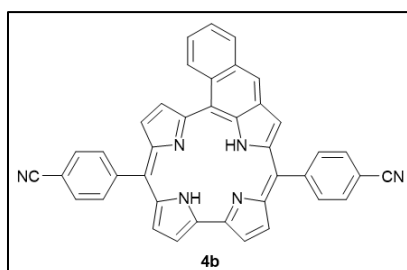

**Naphthocorrole 4b.** Crude product was purified by crystallization from DCM/hexane to afford product of analytical purity. Dark precipitate. Yield: 0.068 g (97%). M.p. 335 °C (decomp). <sup>1</sup>H NMR (THF-*d*<sub>8</sub>, 500 MHz): δ 16.73 (s, 1H, NH), 16.14 (s, 1H, NH), 8.14 (d, *J* = 8.8 Hz, 1H, Ar), 8.01 (s, 1H, Ar), 7.90 (d, *J* = 8.1 Hz, 4H, Ar), 7.77 (dd, *J* = 8.0, 6.0 Hz, 4H, Ar), 7.67 (d, *J* = 7.9 Hz, 1H, Ar), 7.46 (d, *J* = 4.7 Hz, 1H, β-H), 7.24 (t, *J* = 7.4 Hz, 1H, Ar), 7.16 (t, *J* = 7.4 Hz, 1H,

Ar), 6.91 (d, *J* = 4.5 Hz, 1H, β-H), 6.88 (d, *J* = 4.6 Hz, 1H, β-H), 6.83 (d, *J* = 4.7 Hz, 1H, β-H), 6.65-6.61 (m, 2H, Ar), 6.33-6.29 (m, 1H, Ar). <sup>13</sup>C NMR (THF-*d*<sub>8</sub>, 125 MHz): δ 167.0, 159.6, 152.9, 152.3, 142.3, 141.3, 140.5, 137.4, 136.1, 135.6, 135.0, 134.6, 134.2, 133.3, 132.1, 131.9, 131.8, 131.7, 131.3, 131.0, 130.4, 128.5, 126.7, 126.1, 124.8, 123.5, 120.1, 117.9, 117.8, 116.3, 113.5, 113.1, 113.0, 111.0, 110.0. HRMS (APCI): *m/z* calculated for C<sub>40</sub>H<sub>23</sub>N<sub>6</sub>: 587.1984 [*M*+H<sup>+</sup>]; found: 587.1987.

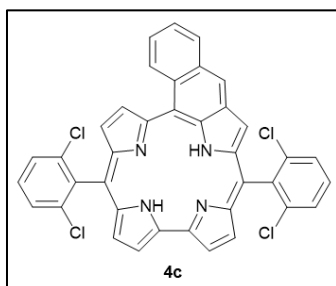

**Naphthocorrole 4c.** Crude product was purified by column chromatography (silica, DCM/hexane, 1:1) and crystallized from DCM/cyclohexane to afford product of analytical purity. Dark blue precipitate. Yield: 0.066 g (81%). M.p. 325 °C (decomp). <sup>1</sup>H NMR (THF-*d*<sub>8</sub>, 500 MHz): δ 16.72 (s, 1H, NH), 16.14 (s, 1H, NH), 8.15 (d, *J* = 8.8 Hz, 1H, Ar), 7.92 (s, 1H, Ar), 7.64 (d, *J* = 8.1 Hz, 1H, Ar), 7.61-7.54 (m, 4H, Ar), 7.53-7.45 (m, 2H, Ar), 7.40 (d, *J* = 4.7 Hz, 1H, β-H), 7.21 (t, *J* = 7.1 Hz, 1H, Ar), 7.13 (t, *J* = 7.1 Hz, 1H, Ar), 6.84 (d, *J* = 4.5 Hz, 1H, β-H), 6.65 (d, *J* = 4.5 Hz, 1H, β-H), 6.63 (d, *J* = 4.7 Hz, 1H, β-H), 6.55 (dd, *J* = 3.8, 2.6 Hz, 1H, Ar), 6.36 (d, *J* = 1.6 Hz, 1H, Ar), 6.06-6.01 (m, 1H, Ar). <sup>13</sup>C NMR (THF-*d*<sub>8</sub>, 125 MHz): δ 168.5, 161.1, 154.9, 153.8, 142.5, 139.0, 137.2, 136.9, 136.7, 135.67, 135.66, 135.4, 135.3, 134.4, 133.14, 133.08, 131.9, 131.8, 131.5, 130.3, 129.4, 129.02, 128.98, 127.6, 126.9, 126.1, 124.4, 119.5, 114.6, 114.5, 111.7. HRMS (EI): *m/z* calculated for C<sub>38</sub>H<sub>20</sub>Cl<sub>4</sub>N<sub>4</sub>: 672.0442 [*M*<sup>+</sup>]; found: 672.0449.

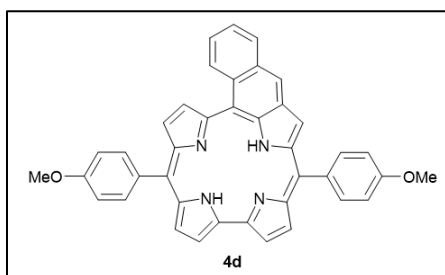

**Naphthocorrole 4d.** Crude product was purified by column chromatography (silica, DCM) and crystallized from DCM/cyclohexane to afford product of analytical purity. Dark precipitate. Yield: 0.060 g (83%). M.p. 238-240 °C. <sup>1</sup>H NMR (THF-*d*<sub>8</sub>, 500 MHz): δ 17.02 (s, 1H, NH), 16.46 (s, 1H, NH), 8.22 (d, *J* = 8.9 Hz, 1H, Ar), 7.96 (s, 1H, Ar), 7.66 (d, *J* = 8.1 Hz, 1H, Ar), 7.54 (dd, *J* = 8.7, 2.4 Hz, 4H, Ar), 7.37 (d, *J* = 4.6 Hz, 1H, β-H), 7.21 (t, *J* = 7.1 Hz, 1H, Ar), 7.13 (t, *J* = 7.1 Hz, 1H, Ar), 7.07 (t, *J* = 8.2 Hz, 4H, Ar), 6.91 (d, *J* = 4.4 Hz, 1H, β-H), 6.88 (d, *J* = 4.6 Hz, 1H, β-H), 6.82 (d, *J* = 4.5 Hz, 1H, β-H), 6.66 (s, 1H, Ar), 6.55-6.50 (m, 1H, Ar), 6.37-6.32 (m, 1H, Ar), 3.89 (s, 6H, OCH<sub>3</sub>). HRMS (ESI): *m/z* calculated for C<sub>40</sub>H<sub>29</sub>N<sub>4</sub>O<sub>2</sub>: 597.2291 [*M*+H<sup>+</sup>]; found: 597.2296.

**Synthesis of naphthocorrole 5a.** Round bottom flask was charged with compound **4a** (0.045 g, 0.063 mmol) and CHCl<sub>3</sub> (50 ml). Zinc acetate dihydrate was dissolved in MeOH (10 ml) and added to the reaction mixture, which was then stirred at 60 °C (oil bath) for 20 h under argon. After this time, the mixture was cooled to room temperature, water was added, extracted by DCM, dried over Na<sub>2</sub>SO<sub>4</sub>, filtered and the solvent was evaporated. Crude precipitate was crystallized from DCM/hexane to afford product of analytical purity.

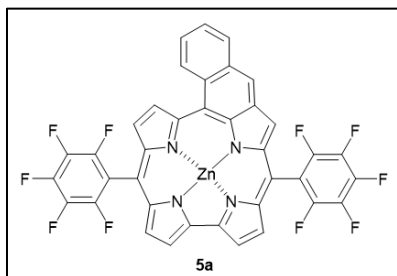

**Naphthocorrole 5a.** Brown precipitate. Yield: 0.041 g (84 %). M.p. 340 °C (decomp). <sup>1</sup>H NMR (THF-*d*<sub>8</sub>, 500 MHz): δ 7.56 (d, *J* = 8.8 Hz, 1H, Ar), 7.29 (s, 1H, Ar), 7.11 (d, *J* = 7.9 Hz, 1H, Ar), 7.00 (d, *J* = 4.7 Hz, 1H, β-H), 6.86 (t, *J* = 7.2 Hz, 1H, Ar), 6.74 (t, *J* = 7.2 Hz, 1H, Ar), 6.51 (d, *J* = 4.6 Hz, 1H, β-H), 6.44 (d, *J* = 4.4 Hz, 1H, β-H), 6.40 (d, *J* = 4.7 Hz, 1H, β-H), 6.30 (d, *J* = 3.8 Hz, 1H, β-H), 6.02 (d, *J* = 3.8 Hz, 1H, β-H), 5.88 (s, 1H, Ar). <sup>19</sup>F NMR (THF-*d*<sub>8</sub>, 470 MHz): δ -164.40 (td, *J* = 23.5, 7.6 Hz, 2F, Ar), -164.02 (td, *J* = 23.4, 7.7 Hz, 2F, Ar), -156.98 (t, *J* = 20.6 Hz, 1F, Ar), -156.58 (t, *J* = 20.5 Hz, 1F, Ar), -141.12 (dd, *J* = 23.6, 7.8 Hz, 2F, Ar), -140.04 (dd, *J* = 23.6, 7.6 Hz, 2F, Ar). HRMS (EI): *m/z* calculated for C<sub>38</sub>H<sub>12</sub>F<sub>10</sub>N<sub>4</sub>Zn: 778.0194 [*M*<sup>+</sup>]; found: 778.0195.

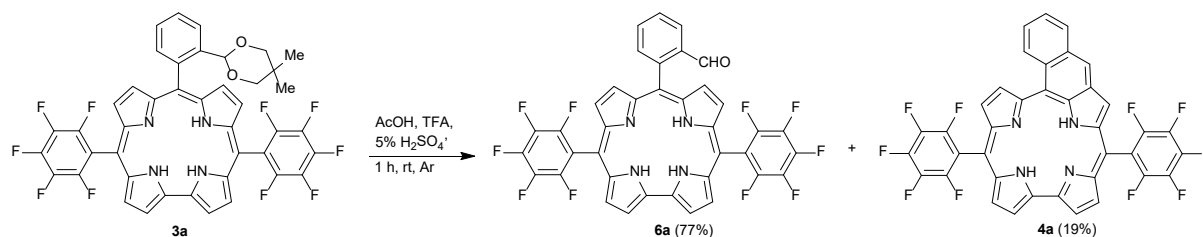

**Scheme S2.** Synthesis of 10-(2-formylphenyl)-5,15-bis(pentafluorophenyl)corrole (**6a**).

**Synthesis of 10-(2-formylphenyl)-5,15-bis(pentafluorophenyl)corrole (6a).** Corrole **3a** (0.214 g, 0.26 mmol) was dissolved in acetic acid (50 ml). Subsequently, TFA (25 ml) and 5% aq solution of H<sub>2</sub>SO<sub>4</sub> (12 ml) were added and the reaction mixture was stirred at room temperature for 1 h under argon. Then, water was added, and the resulting mixture was extracted by CHCl<sub>3</sub>. Saturated solution of K<sub>2</sub>CO<sub>3</sub> in water was added to the organic phase and extracted again by CHCl<sub>3</sub>. The combined organic layers were dried over Na<sub>2</sub>SO<sub>4</sub>, filtered, and evaporated. The crude product was purified by column chromatography (silica, DCM/hexane, 2:1) and crystallized from hot MeOH to afford product of analytical purity.

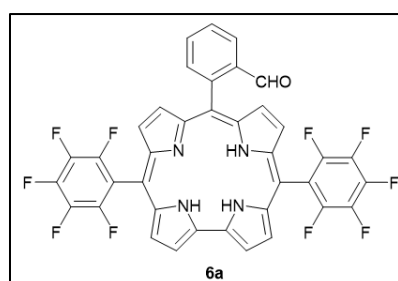

**10-(2-formylphenyl)-5,15-bis(pentafluorophenyl)corrole (6a).** Violet precipitate. Yield: 0.147 g (77%). M.p. 203 °C (decomp). <sup>1</sup>H NMR (CDCl<sub>3</sub>, 500 MHz): δ 9.49 (s, 1H, Ar), 9.15 (d, *J* = 4.1 Hz, 2H, β-H), 8.72 (d, *J* = 4.1 Hz, 2H, β-H), 8.59 (bs, 2H, Ar), 8.49 (d, *J* = 4.7 Hz, 2H, β-H), 8.42-8.36 (m, 1H, Ar), 8.16 (bs, 1H, Ar), 7.96-7.89 (m, 2H, Ar). Signals from the inner NH groups were not visible. <sup>19</sup>F NMR (CDCl<sub>3</sub>, 470 MHz): δ -161.90 – -161.30 (m, 4F, Ar), -152.48 (bs, 2F, Ar), -138.03 (d, *J* = 21.6 Hz, 2F, Ar), -137.59 (d, *J* = 21.7 Hz, 2F, Ar). HRMS (ESI): *m/z* calculated for C<sub>38</sub>H<sub>17</sub>F<sub>10</sub>N<sub>4</sub>O: 735.1243 [*M*+H<sup>+</sup>]; found: 735.1240.

Ar), -138.03 (d, *J* = 21.6 Hz, 2F, Ar), -137.59 (d, *J* = 21.7 Hz, 2F, Ar). HRMS (ESI): *m/z* calculated for C<sub>38</sub>H<sub>17</sub>F<sub>10</sub>N<sub>4</sub>O: 735.1243 [*M*+H<sup>+</sup>]; found: 735.1240.

### 3. Crystallographic Data

**Table S1.** Crystallographic data for compound **4a**.

|                               |                                                                |                 |
|-------------------------------|----------------------------------------------------------------|-----------------|
| <b>Chemical formula</b>       | C <sub>38</sub> H <sub>14</sub> F <sub>10</sub> N <sub>4</sub> |                 |
| <b>Formula weight</b>         | 716.53 g/mol                                                   |                 |
| <b>Temperature</b>            | 100 K                                                          |                 |
| <b>Wavelength</b>             | 1.54184 Å                                                      |                 |
| <b>Crystal size</b>           | 0.1 x 0.04 x 0.03 mm                                           |                 |
| <b>Crystal habit</b>          | violet block                                                   |                 |
| <b>Crystal system</b>         | monoclinic                                                     |                 |
| <b>Space group</b>            | P21/a                                                          |                 |
| <b>Unit cell dimensions</b>   | a = 7.5781(3) Å                                                | α = 90°         |
|                               | b = 25.7071(9) Å                                               | β = 104.588(4)° |
|                               | c = 14.9710(5) Å                                               | γ = 90°         |
| <b>Volume</b>                 | 2822.49(18) Å <sup>3</sup>                                     |                 |
| <b>Z</b>                      | 4                                                              |                 |
| <b>Density</b>                | 1.686 g/cm <sup>3</sup>                                        |                 |
| <b>Absorption coefficient</b> | 1.289 mm <sup>-1</sup>                                         |                 |
| <b>F(000)</b>                 | 1440                                                           |                 |
| <b>Index ranges</b>           | -9 ≤ h ≤ 9, -31 ≤ k ≤ 31, -18 ≤ l ≤ 18                         |                 |
| <b>Diffractometer</b>         | Rigaku SuperNova                                               |                 |

|                                         |                                                 |                           |
|-----------------------------------------|-------------------------------------------------|---------------------------|
| <b>Radiation source</b>                 | CuK $\alpha$                                    |                           |
| <b>Reflections collected</b>            | 17379                                           |                           |
| <b>Independent reflections</b>          | 5135 [R(int) = 0.0332]                          |                           |
| <b>Tmin, Tmax</b>                       | 0.457, 1.000                                    |                           |
| <b>Absorption correction</b>            | multi-scan                                      |                           |
| <b>Refinement method</b>                | Full-matrix least-squares on F <sup>2</sup>     |                           |
| <b>Restraints / parameters</b>          | 0 / 519                                         |                           |
| <b>Goodness-of-fit on F<sup>2</sup></b> | 1.220                                           |                           |
| <b>Final R indices</b>                  | [F <sup>2</sup> > 2 $\sigma$ (F <sup>2</sup> )] | R1 = 0.0737, wR2 = 0.1467 |
|                                         | all data                                        | R1 = 0.0801, wR2 = 0.1493 |

Single crystal X-ray diffraction measurements were carried out on a Rigaku SuperNova diffractometer, at 100 K with Cu K $\alpha$  radiation (1.54184 Å). Violet crystal of approximate dimensions of 0.1 x 0.04 x 0.03 mm (block) was used. The structures were solved by direct methods and refined on F<sup>2</sup> by full-matrix least-squares. All non-hydrogen atoms were refined as anisotropic while hydrogen atoms were placed in calculated positions, and refined in riding mode.

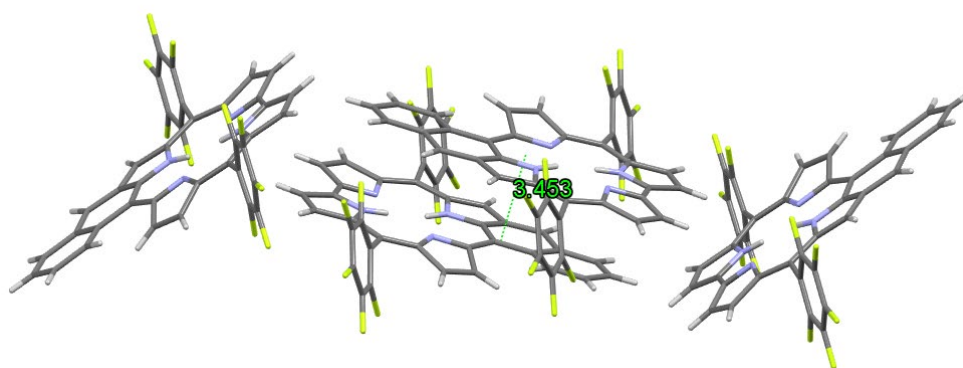

**Figure S1.** Packing diagram of crystal in elementary cell of compound **4a**.

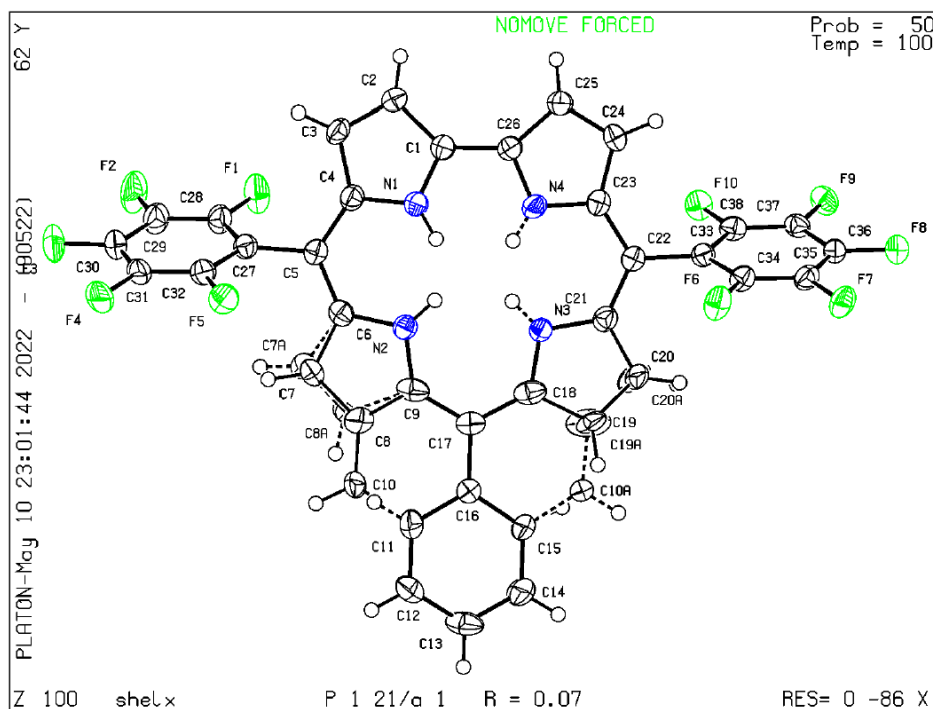

**Figure S2.** Thermal ellipsoid plot for compound **4a** with 50% probability level of ellipsoids contour.

## 4. Experimental Methods

Spectroscopic grade solvents were purchased from Sigma-Aldrich and used as obtained. For optical studies solutions of molecules at low concentrations, about few micromoles per liter, were used to avoid dimerization or reabsorption effects. All absorption and fluorescence spectra were taken at room temperature (21 °C). A Perkin Elmer UV/VIS Spectrometer model Lambda 35 was used for absorption spectra measurement. Fluorescence spectra were recorded with the FLS 1000 Spectrofluorometer from Edinburgh Instruments and corrected for the spectral response sensitivity of the photodetector. Fluorescence quantum yields (FQY) of molecules in solvents at 21 °C were determined using an integrating sphere. Molar absorptivity (absorption coefficient),  $\epsilon$  was calculated from absorbance,  $A$ , of solution of given molar concentration,  $c$ , in cuvette of length,  $l$ , with a well-known formula  $A=c \cdot \epsilon \cdot l$ .

## 5. Spectroscopic Data

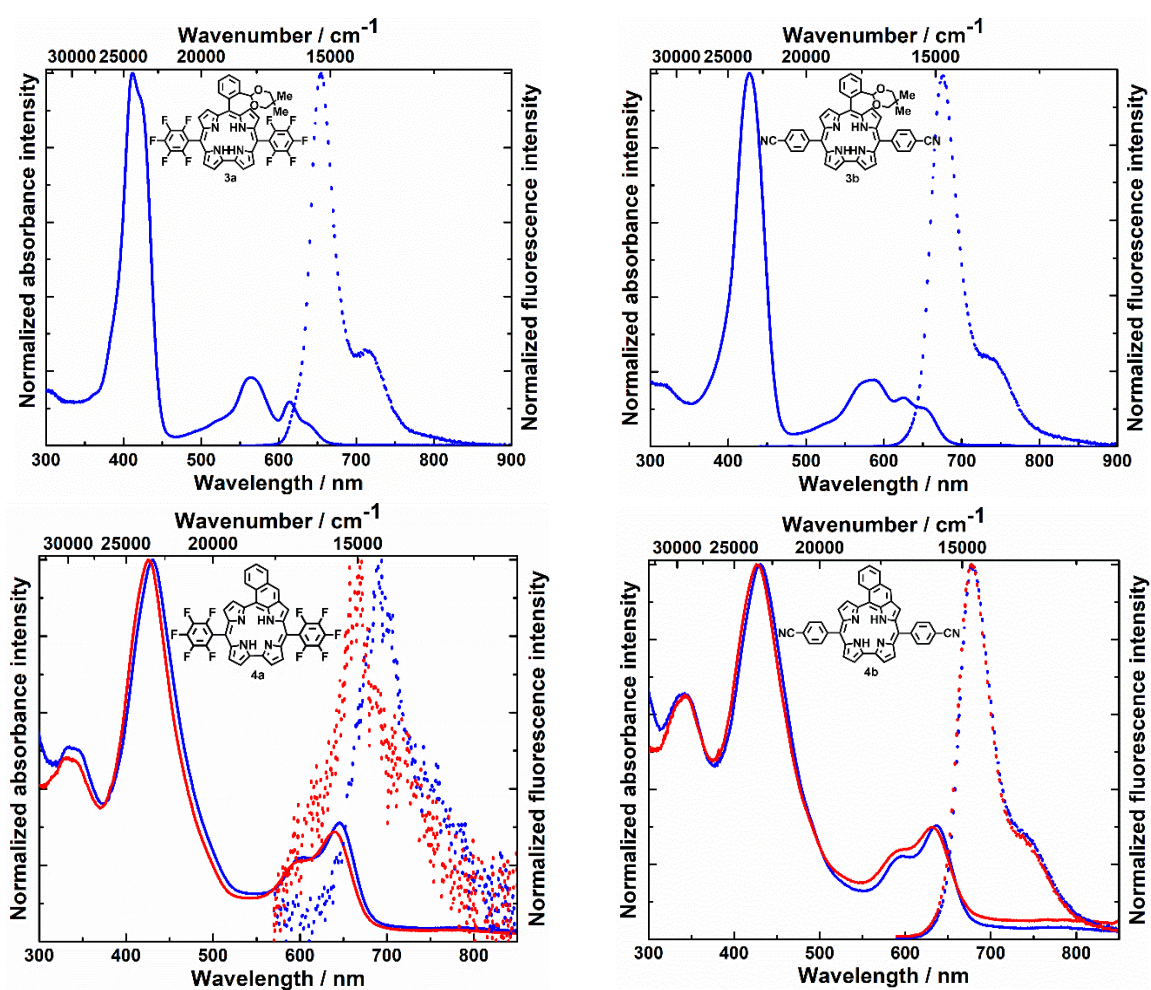



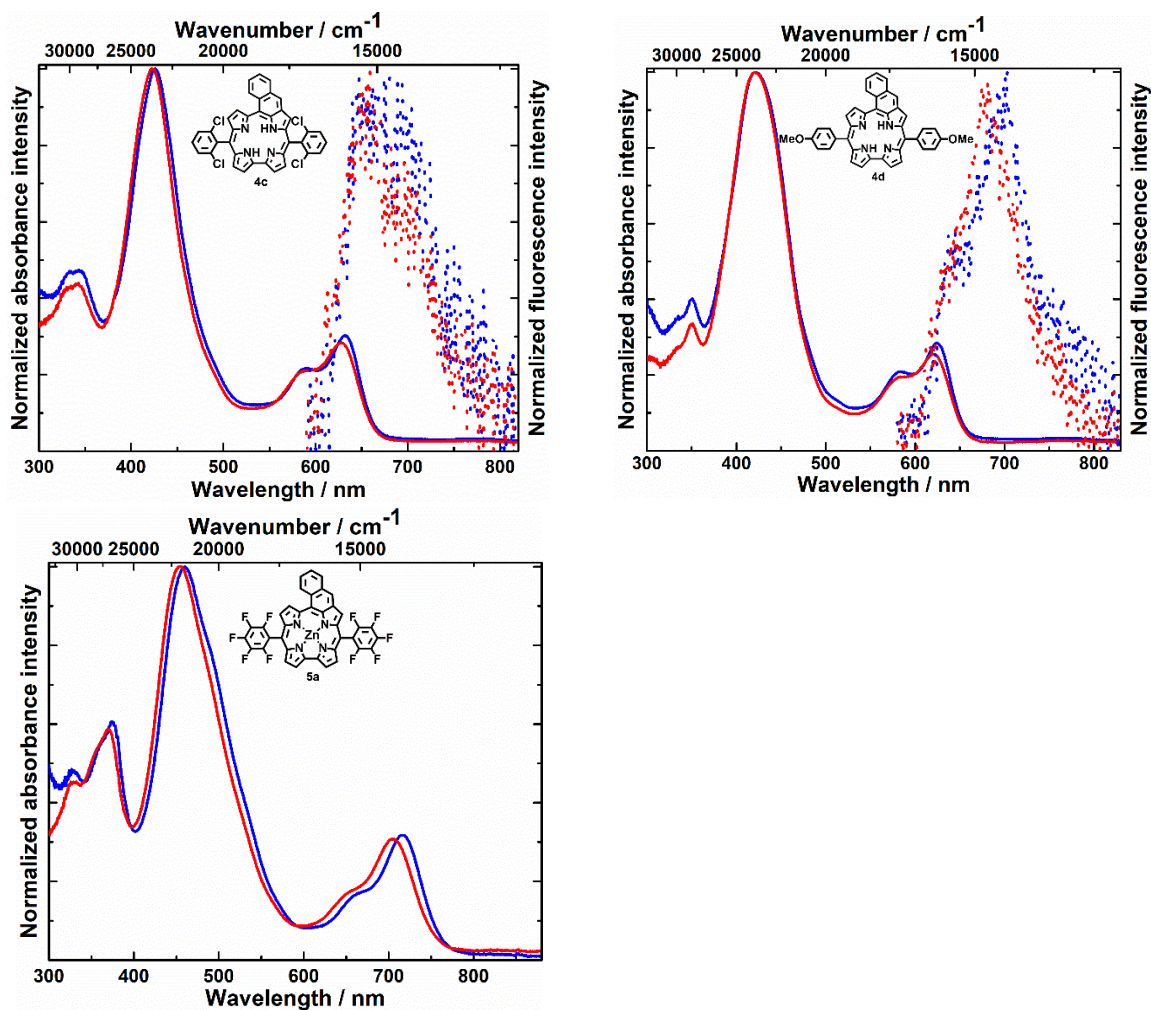

**Figure S3.** Absorption (solid line) and emission (dot line) spectra of compounds **3a-b** (excited at 405 and 420 nm respectively), **4a-d** (excited at 430 nm) and **5a** measured in toluene (blue) and DCM (red).

**Table S2.** Spectroscopic properties of compounds **3a-b**, **4a-d** and **5a** obtained in toluene and DCM.

| Compound  | Solvent | $\lambda_{\text{abs}}^{\text{max}}$<br>[nm] | $\lambda_{\text{em}}^{\text{max}}$<br>[nm] | $\epsilon$<br>[M <sup>-1</sup> cm <sup>-1</sup> ] | Stokes shift <sup>a</sup><br>[cm <sup>-1</sup> ] | $\Phi_{\text{F}}$ |
|-----------|---------|---------------------------------------------|--------------------------------------------|---------------------------------------------------|--------------------------------------------------|-------------------|
| <b>3a</b> | toluene | 412                                         |                                            | 115800                                            |                                                  | 0.08 <sup>b</sup> |
|           |         | 564                                         |                                            | 21200                                             |                                                  |                   |
|           |         | 614                                         |                                            | 13600                                             |                                                  |                   |
|           |         | 640                                         | 655                                        | 6500                                              | 350                                              |                   |
| <b>3b</b> | toluene | 427                                         |                                            | 109000                                            |                                                  | 0.17 <sup>b</sup> |
|           |         | 587                                         |                                            | 19500                                             |                                                  |                   |
|           |         | 624                                         |                                            | 14200                                             |                                                  |                   |
|           |         | 655                                         | 675                                        | 10800                                             | 450                                              |                   |
| <b>4a</b> | toluene | 335                                         |                                            | 26700                                             |                                                  | nd <sup>c</sup>   |
|           |         | 431                                         |                                            | 52200                                             |                                                  |                   |
|           |         | 604                                         |                                            | 11500                                             |                                                  |                   |
|           |         | 645                                         | 689                                        | 16300                                             | 1000                                             |                   |
|           | DCM     | 334                                         |                                            | 26800                                             |                                                  |                   |

|           |         |     |     |       |      |                     |
|-----------|---------|-----|-----|-------|------|---------------------|
|           |         | 426 |     | 55700 |      | nd <sup>c</sup>     |
|           |         | 600 |     | 11800 |      |                     |
|           |         | 640 | 667 | 16000 | 600  |                     |
| <b>4b</b> | toluene | 342 |     | 32700 |      | <0.001 <sup>b</sup> |
|           |         | 431 |     | 49800 |      |                     |
|           |         | 596 |     | 11100 |      |                     |
|           |         | 636 | 677 | 15100 | 950  |                     |
|           | DCM     | 342 |     | 31400 |      | <0.001 <sup>b</sup> |
|           |         | 426 |     | 48200 |      |                     |
|           |         | 595 |     | 11500 |      |                     |
|           |         | 632 | 677 | 14400 | 1050 |                     |
| <b>4c</b> | toluene | 346 |     | 25100 |      | nd <sup>c</sup>     |
|           |         | 426 |     | 53100 |      |                     |
|           |         | 590 |     | 11500 |      |                     |
|           |         | 631 | 681 | 16000 | 1200 |                     |
|           | DCM     | 343 |     | 25400 |      | nd <sup>c</sup>     |
|           |         | 423 |     | 57700 |      |                     |
|           |         | 586 |     | 12100 |      |                     |
|           |         | 628 | 659 | 16400 | 750  |                     |
| <b>4d</b> | toluene | 351 |     | 24900 |      | nd <sup>c</sup>     |
|           |         | 421 |     | 61900 |      |                     |
|           |         | 583 |     | 12900 |      |                     |
|           |         | 624 | 701 | 17600 | 1800 |                     |
|           | DCM     | 351 |     | 21600 |      | nd <sup>c</sup>     |
|           |         | 421 |     | 64300 |      |                     |
|           |         | 583 |     | 12600 |      |                     |
|           |         | 620 | 681 | 16400 | 1400 |                     |
| <b>5a</b> | toluene | 375 |     | 26900 |      | nd <sup>c</sup>     |
|           |         | 460 |     | 44400 |      |                     |
|           |         | 716 |     | 14100 |      |                     |
|           | DCM     | 371 |     | 29600 |      | nd <sup>c</sup>     |
|           |         | 455 |     | 50300 |      |                     |
|           |         | 705 |     | 15500 |      |                     |

<sup>a</sup>Stokes shift calculated as a difference between lowest energy absorption band and highest energy emission band expressed in cm<sup>-1</sup>, <sup>b</sup>fluorescence quantum yield measured using an integrating sphere, <sup>c</sup>not detected.

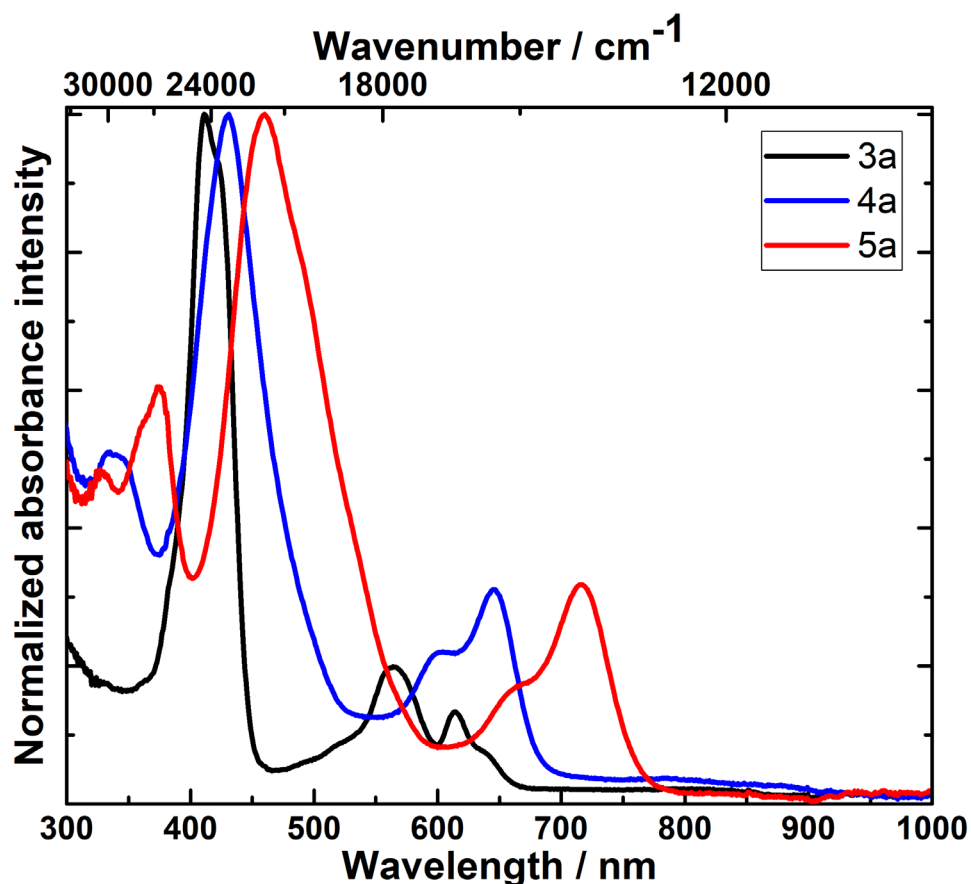

**Figure S4.** Absorption spectra of compounds **3a** (black), **4a** (blue) and **5a** (red) measured in toluene.

## 6. Computational Results

True minima for **4a** and **6a** have been determined using Gaussian16 at the B972/6-31G(d) level, using the SMD solvent to model the solvent (chloroform for **6a** and THF for **4a**).

The optimized geometry of **4a** turns out similar to the X-ray crystal structure.

The calculation of the magnetic response has been done still with the SMD model and the appropriate solvent, but at the B972/6-311+G(2d,p) level, and using the CSGT method<sup>S1</sup> to distribute the origin, according to the Gaussian16 keywords NMR=CSGT output=(csgt,wfx).

The \*.wfx file was then used in SYSMOIC to compute the current density and the current strengths, according to the CTOCD-DZ2 method.<sup>S2-S3</sup> Selected results are reported in Figs. S5-S8 and Table S3-S4.

Isotropic nuclear shieldings, which can be obtained by integration of the current density and are an indirect indication of its quality, are reported in Table S3, together with the computed chemical shifts, obtained as  $\delta_{\text{calc}} = A + B \sigma_{\text{iso}}$ , where the values  $A=31.29(5)$  ppm and  $B=-0.974(5)$  have been determined by least squares refinement of  $\sigma_{\text{iso}}$  vs  $\delta_{\text{exp}}$ . ( $R^2=0.9996$ ), in analogy with ref. S4.

**Table S3.** Computed isotropic proton nuclear shieldings and chemical shifts for **4a**. All entries in ppm, but for the numbers of the proton, consistent with Cartesian coordinates, reported below.

| #H | $\sigma_{\text{iso}}$ | $\delta_{\text{exp}}$ | $\delta_{\text{calc}}$ |
|----|-----------------------|-----------------------|------------------------|
| 54 | 15.3506               | 16.39                 | 16.36                  |
| 24 | 15.9119               | 15.81                 | 15.79                  |
| 59 | 23.3644               | 8.10                  | 8.14                   |
| 66 | 23.4353               | 8.01                  | 8.06                   |
| 63 | 23.7539               | 7.66                  | 7.74                   |
| 28 | 23.9725               | 7.51                  | 7.51                   |
| 62 | 24.1332               | 7.26                  | 7.35                   |
| 64 | 24.2463               | 7.15                  | 7.23                   |
| 29 | 24.5338               | 6.97                  | 6.94                   |
| 25 | 24.5901               | 6.92(4)               | 6.88                   |
| 26 | 24.6410               | 6.92(4)               | 6.83                   |
| 27 | 24.7816               | 6.70(2)               | 6.68                   |
| 30 | 24.8136               | 6.70(2)               | 6.65                   |
| 31 | 25.2102               | 6.35(3)               | 6.24                   |

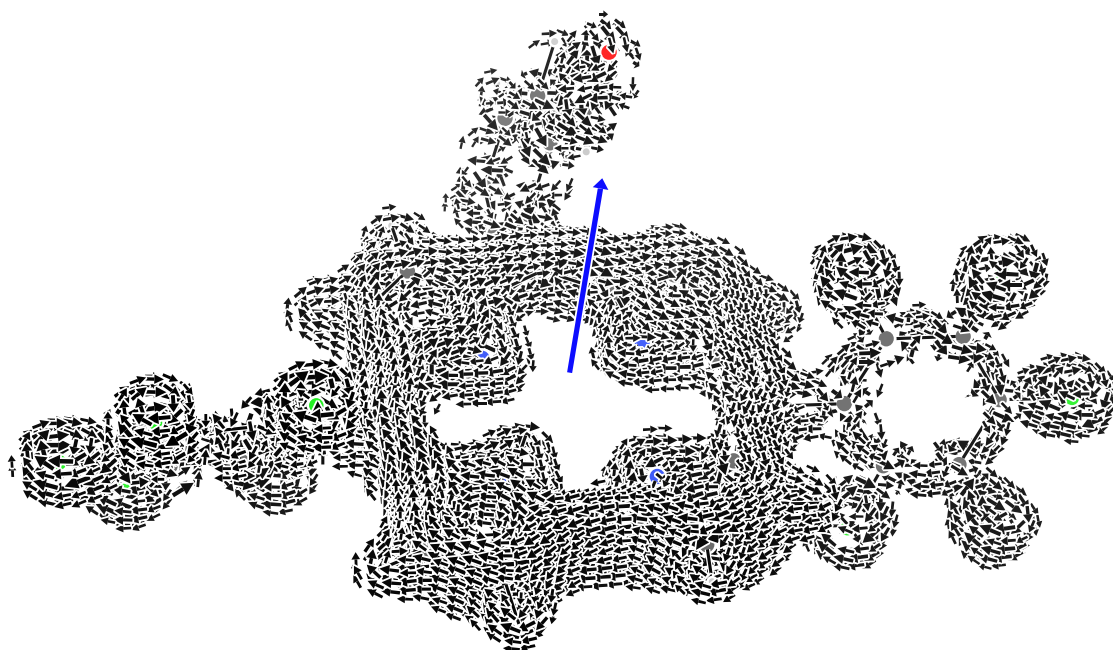

**Figure S5.** All-electron current density induced in **6a** by a unitary magnetic field (blue arrow) parallel to the Cartesian  $z$ -axis. Diatropic and paratropic currents are clockwise and anticlockwise, respectively. Currents lower/higher than 0.05/0.15 au are not shown.

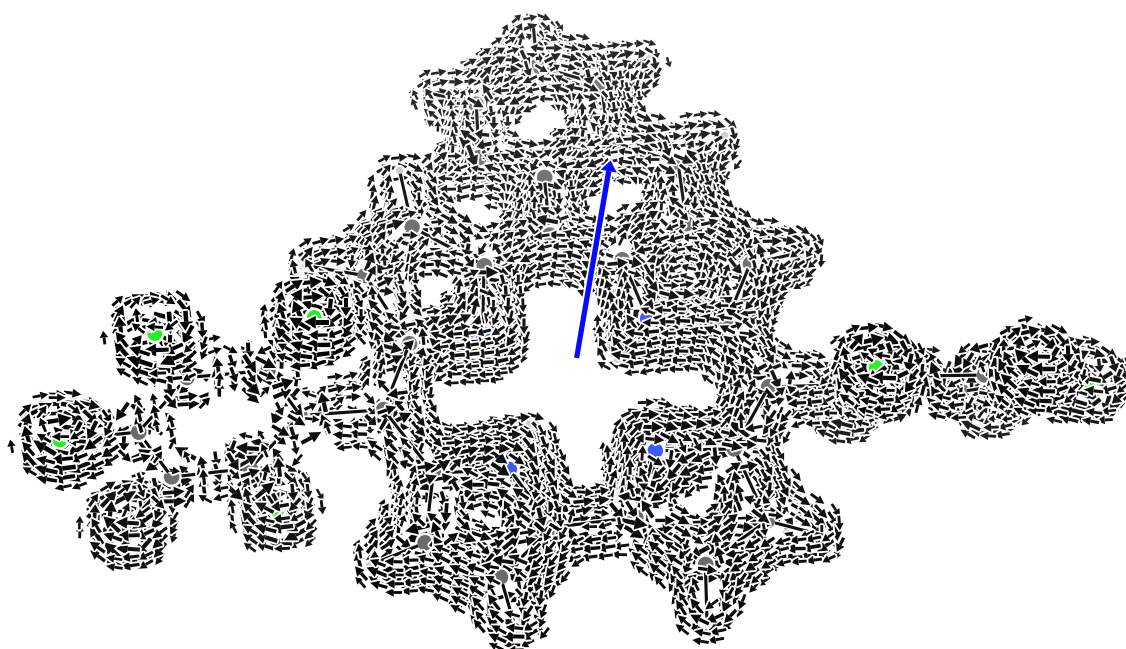

**Figure S6.** All-electron current density induced in **4a** by a unitary magnetic field (blue arrow) parallel to the Cartesian  $z$ -axis. Diatropic and paratropic currents are clockwise and anticlockwise, respectively. Currents lower/higher than 0.05/0.15 au are not shown.

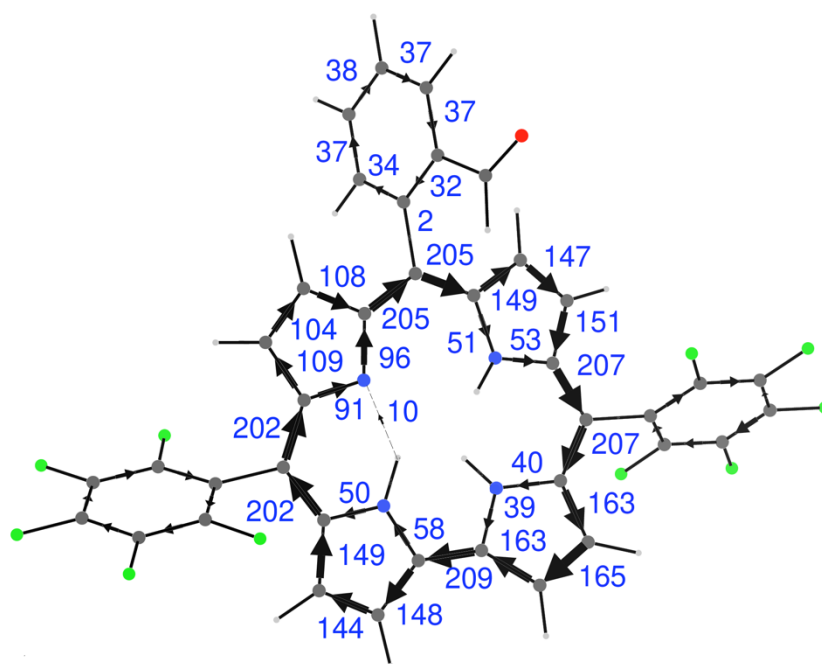

**Figure S7.** Bond current strengths for **6a**, computed in domains bisecting the bonds and extending up to  $1 \cdot 10^{-3}$  au, expressed in percent units: a value of 100 equals the current strength of benzene ( $11.8 \text{ nA T}^{-1}$  using the same method of calculation). The areas of the arrows are proportional to the current strength values. The magnetic field is oriented towards the reader, diatropic and paratropic currents are clockwise and anticlockwise, respectively.

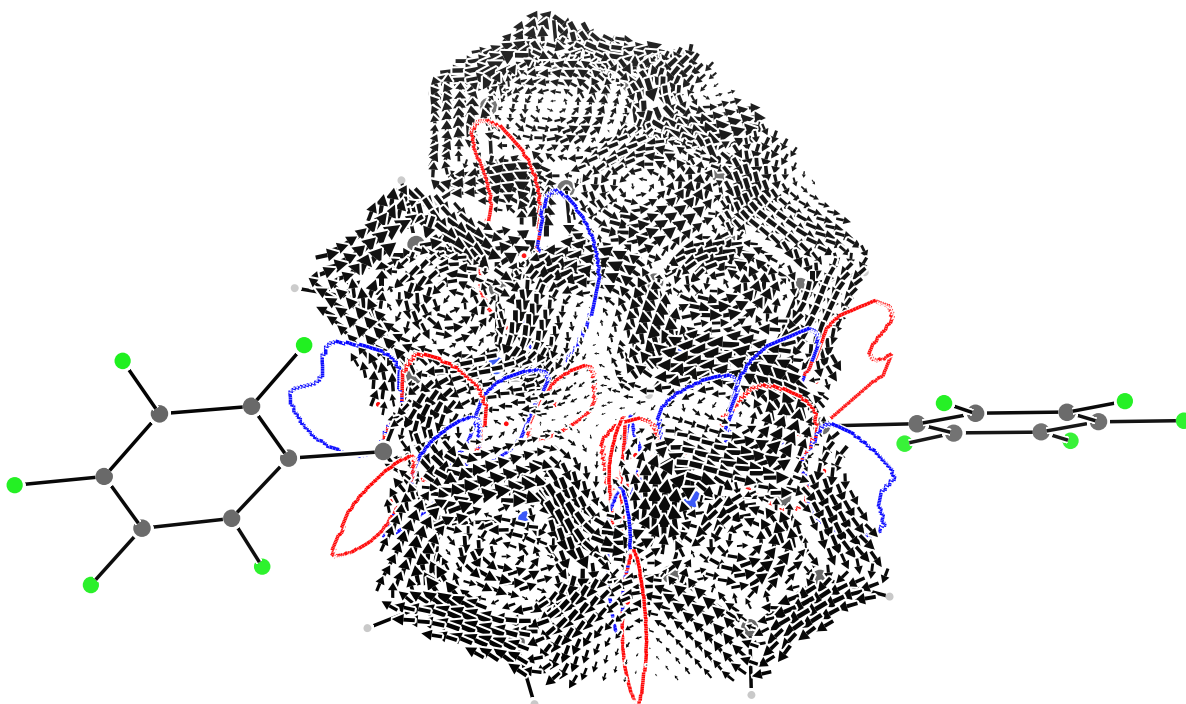

**Figure S8.** Current density computed on a surface placed 1 au above the rings of **4a**. The border of the integration domains used to produce the bond current strengths displayed in Fig. 3 are shown as blue and red closed curves.

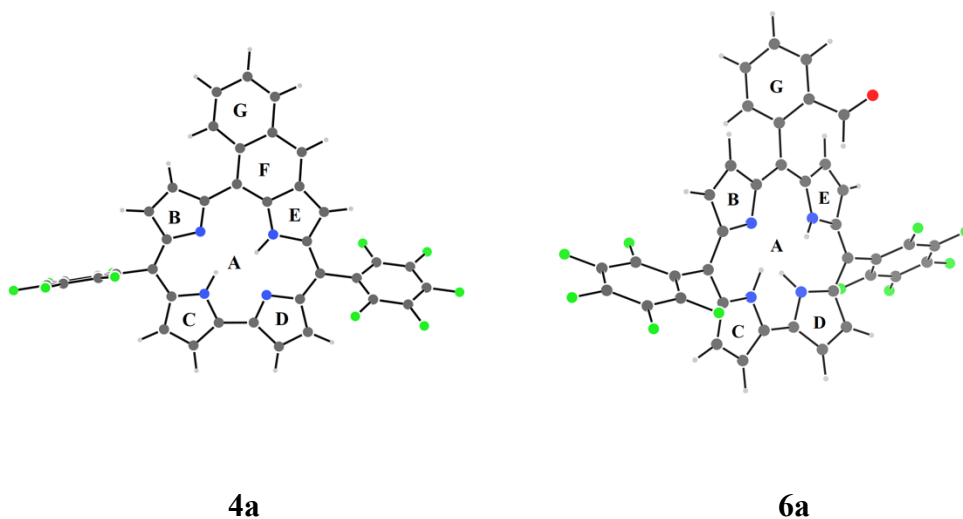

**Scheme S3.** Ring labels of **4a** and **6a** needed for the interpretation of data in Table S4.

**Table S4.** Indicators of aromaticity for rings of **4a** and **6a**, all obtained at the B972/6-311+G(2d,p) level with implicit solvent (SMD, tetrahydrofuran for **4a**, chloroform for **6a**). Rings are labeled according to Scheme S3.  $\overline{I}_0\%$  is the percentage of ring current strength of benzene signed according to the contribution given to the magnetizability: negative/positive for a diatropic/paratropic ring current. Ring current percentages and NICS<sup>S5</sup> values have been computed with SYSMOIC, HOMA (Harmonic Oscillator Model of Aromaticity)<sup>S6</sup> with Multiwfn.<sup>S7</sup>

| Ring | $\overline{I}_0\%$ <sup>a</sup> |           | NICS <sub><math>\pi,zz</math></sub> (1) <sup>b,c</sup> |           | NICS <sub>zz</sub> (1) <sup>c</sup> |           | HOMA                          |                               |
|------|---------------------------------|-----------|--------------------------------------------------------|-----------|-------------------------------------|-----------|-------------------------------|-------------------------------|
|      | <b>4a</b>                       | <b>6a</b> | <b>4a</b>                                              | <b>6a</b> | <b>4a</b>                           | <b>6a</b> | <b>4a</b>                     | <b>6a</b>                     |
| A    | +14                             | -205      | 8.3                                                    | -37.6     | 12.3                                | -31.2     | 0.459 <sup>d</sup><br>(0.693) | 0.714 <sup>d</sup><br>(0.845) |
| B    | -33                             | -107      | -6.6                                                   | -14.7     | -8.6                                | -17.2     | 0.422                         | 0.720                         |
| C    | -54                             | -147      | -13.0                                                  | -30.6     | -16.7                               | -32.2     | 0.912                         | 0.876                         |
| D    | -24                             | -164      | -2.8                                                   | -29.2     | -6.4                                | -32.3     | 0.436                         | 0.851                         |
| E    | -33                             | -149      | -5.1                                                   | -28.0     | -8.0                                | -30.5     | 0.745                         | 0.516                         |
| F    | -31                             | --        | -2.7                                                   | --        | -0.8                                | --        | 0.573                         | --                            |
| G    | -59                             | --        | -16.1                                                  | -19.8     | -15.0                               | -26.3     | 0.712                         | 0.956                         |

a) Values of  $\overline{I}_0\%$  have been obtained from Fig. 3 and Fig. S5 averaging over bonds that should have the same current according to the current conservation.

b) For non-planar molecules the  $\sigma/\pi$  separation cannot be clear cut. A set of 23 and 24 orbitals has been selected for **4a** and **6a**, respectively, combining visual inspection and the low density value at the nuclei and at bond midpoints. Orbitals numbers are 180, 179, 178, 177, 176, 175, 174, 173, 172, 171, 170, 169, 167, 165, 164, 161, 158, 133, 131, 127, 126, 125, 124 for **4a**, 115, 116, 121, 122, 124, 127, 129, 130, 131, 165, 169, 170, 171, 173, 174, 175, 176, 177, 178, 179, 180, 183, 184, 185 for **6a**.

c) The magnetic shielding tensor  $\sigma_R$  at 1 Å above the average plane of ring R has been obtained by integration of the current density. Then the NICS<sub>zz</sub> of ring R has been computed as  $\text{NICS}_{zz}^R = -\mathbf{n}^T \sigma_R \mathbf{n}$ , where  $\mathbf{n}$  is the unit column vector perpendicular to the average plane of ring R and T indicates transposition.

d) The HOMA of the macrocycle has been computed either following the outer path (the first entry) or the inner path passing through the 4 N atoms (value in parentheses).

## 7. Electrochemical Data

All compounds were tested in 0.1 M Tetrabutylammonium tetrafluoroborate (TBABF<sub>4</sub>)/Benzonitrile solution (50 mM). The electrochemical measurements were performed with Bio-Logic VSP potentiostat. Cyclic voltammetry (CV) was conducted at scan rate of 100 mV/s under inert atmosphere. A 3-electrodes cell was placed in a sealed box and washed for an hour with Ar. Ar was bubbled into the solution 2 mins before the measurement. The working, counter, and pseudo-reference electrodes were Pt wire, glassy carbon rod and Ag wire, respectively. The reference potential was calibrated against ferrocene/ferrocenium redox couple by adding a small amount of ferrocene to the tested solution after the experiments. All potentials are reported vs. Fc/Fc<sup>+</sup>.

**Spectroelectrochemistry:** Since these compounds have nonaromatic character, they are expected to have fast and complicated electron transitions, and the shifts in the absorption spectra were relatively small. The most significant changes were found at the split Soret peaks of compounds **4a** and **4d**. This split peak can be deconvoluted into two main peaks with maxima at 432.4 nm and 451.0 nm for **4a** and, 426.2 nm and 442.9 nm for **4b**. Upon increasing the applied potential from beyond the reduction peak (in the CV), towards higher potentials, there is decrease in the intensity of the Soret peak located at the higher wavelength in parallel to increase in the intensity of the lower one.



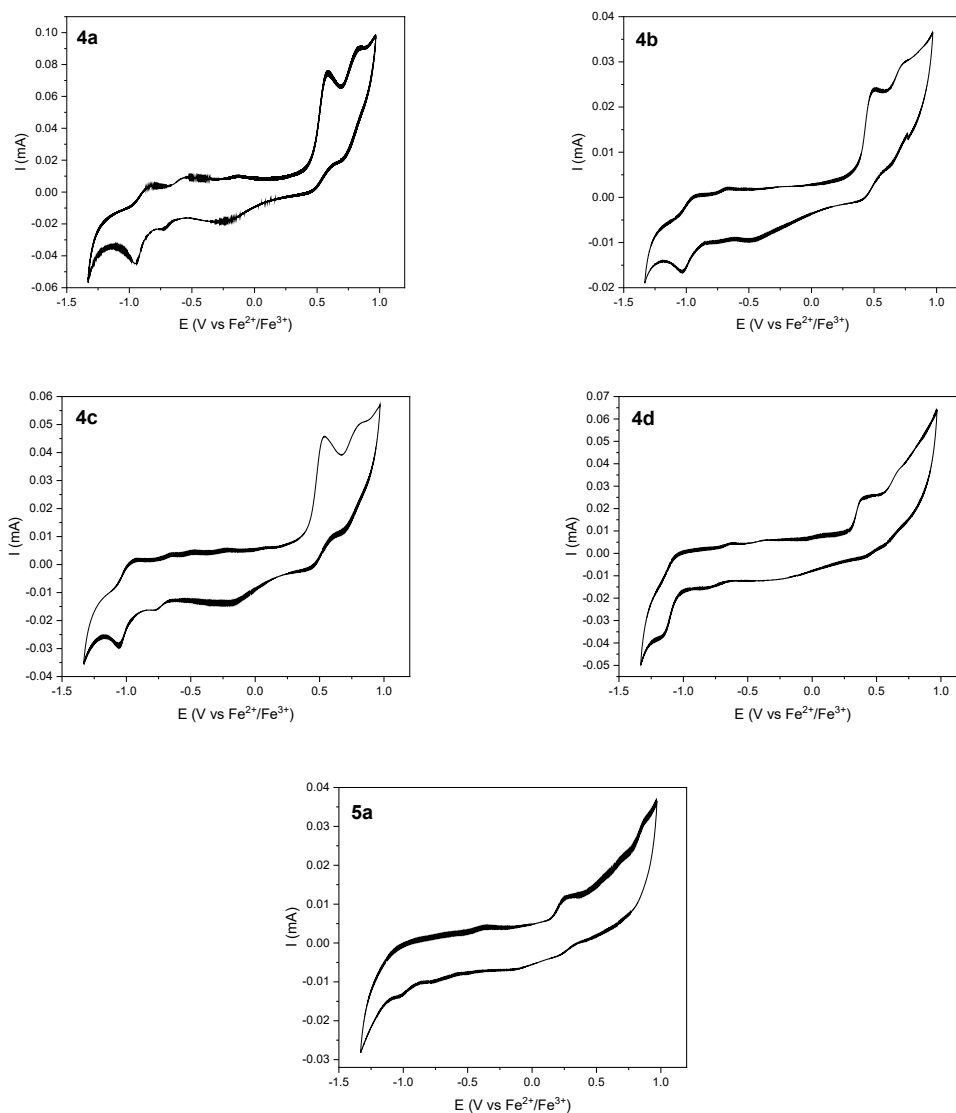

**Figure S9.** Cyclic voltammograms for compounds **4a-d** and **5a**.

**Table S5.** HOMO-LUMO energy values for compounds **4a-d** and **5a**.

| compound  | $E_{onset}^{Oxidation}(V)$ | $E_{HOMO}(eV)$ | $E_{onset}^{Reduction}(V)$ | $E_{LUMO}(eV)$ | $E_{gap}(eV)$ |
|-----------|----------------------------|----------------|----------------------------|----------------|---------------|
| <b>4a</b> | 0.443                      | -5.243         | -0.85                      | -3.95          | 1.293         |
| <b>4b</b> | 0.376                      | -5.176         | -0.905                     | -3.895         | 1.281         |
| <b>4c</b> | 0.408                      | -5.208         | -0.953                     | -3.847         | 1.361         |
| <b>4d</b> | 0.307                      | -5.107         | -1.049                     | -3.751         | 1.356         |
| <b>5a</b> | 0.141                      | -4.941         | -0.913                     | -3.887         | 1.054         |

The HOMO and LUMO energies were calculated using the following equation:

$$E_{HOMO}^{LUMO}(eV) = -E_{onset}^{Ox/Red} - 4.8 eV$$



The HOMO-LUMO energy gap was calculated from the difference between  $E_{\text{HOMO}}$  to  $E_{\text{LUMO}}$ .<sup>S8-S9</sup>

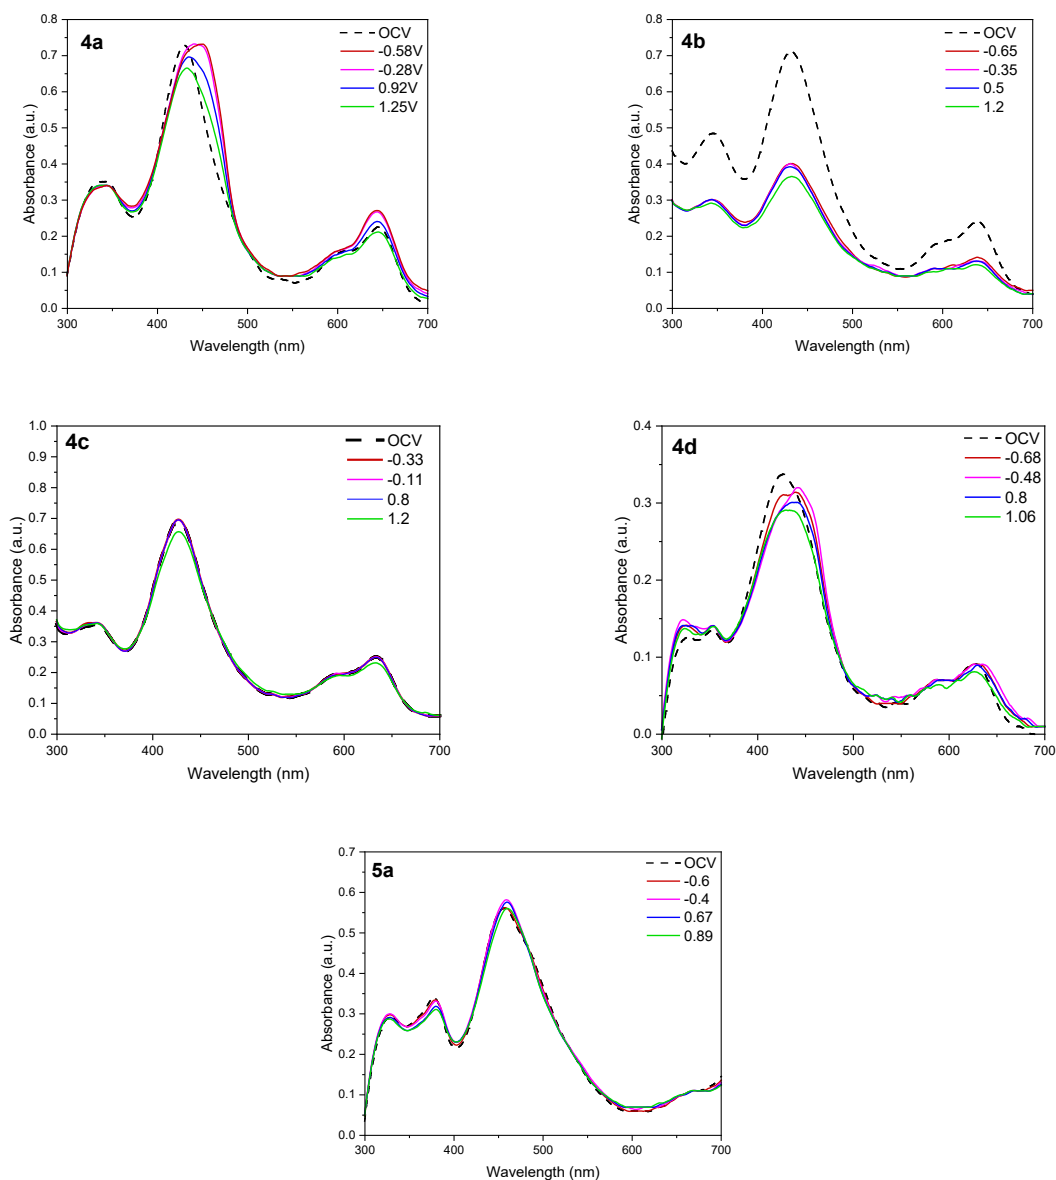

**Figure S10.** UV-visible spectroelectrochemical measurements for compounds 4a-d and 5a.

The samples were analyzed by using an ocean optics DH-2000-BAL deuterium halogen source spectrophotometer. A quartz three-electrode cell was used Ag wire as pseudo reference and Pt mesh and wire as working and counter electrodes, respectively. The electrode potential was held for 1min before and after the redox peaks after which the UV-Vis spectra were recorded.

## 8. NMR Spectra

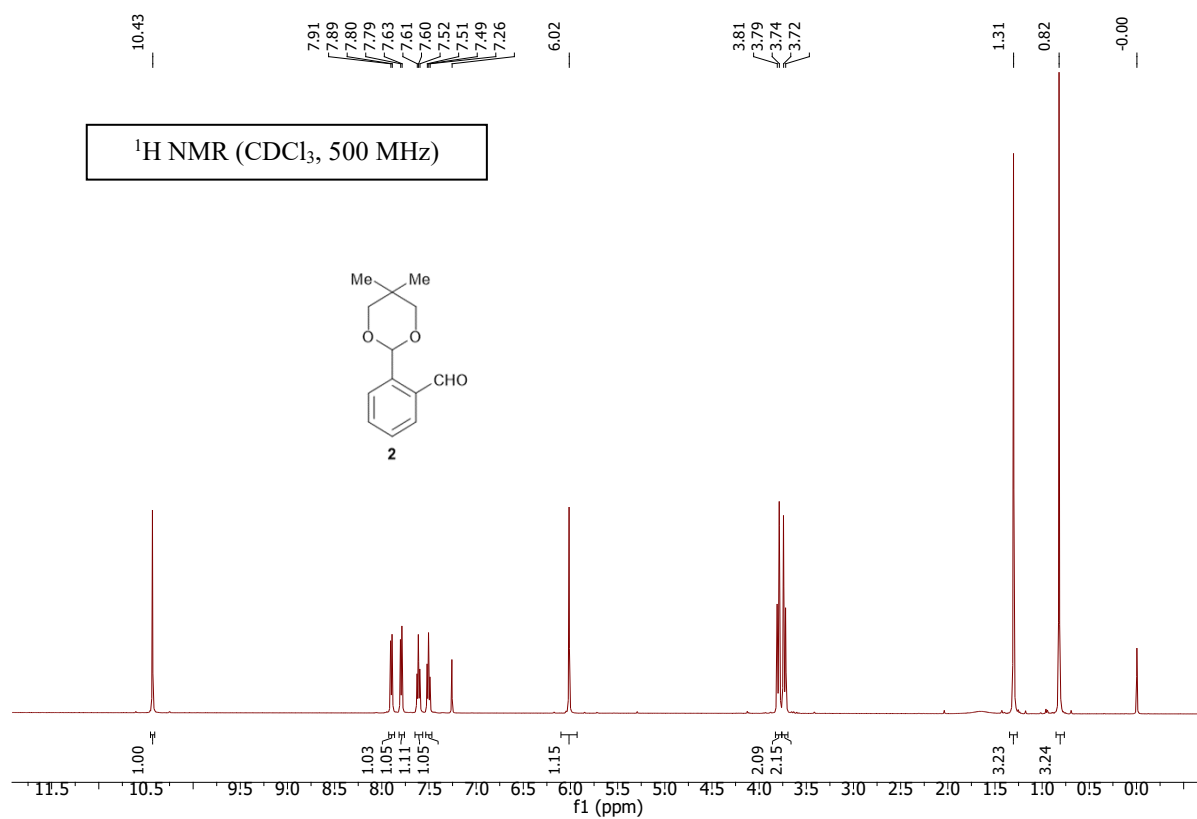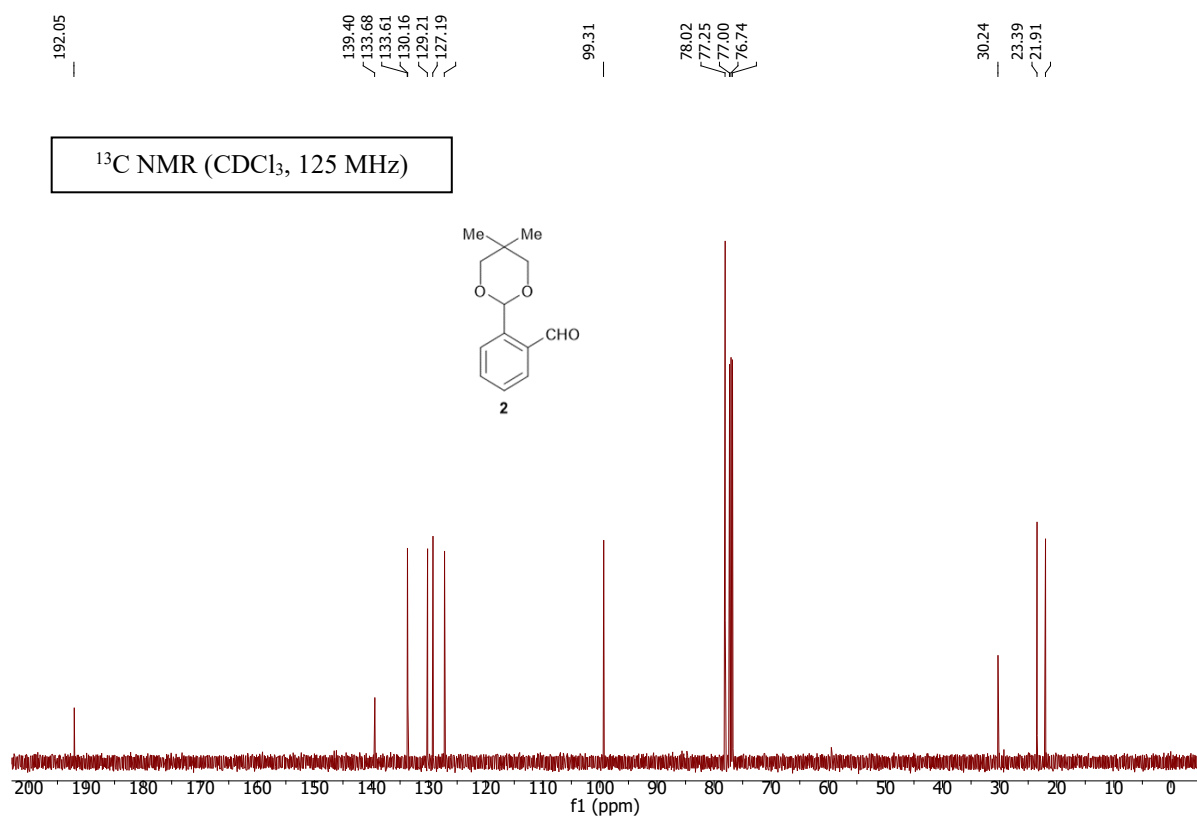

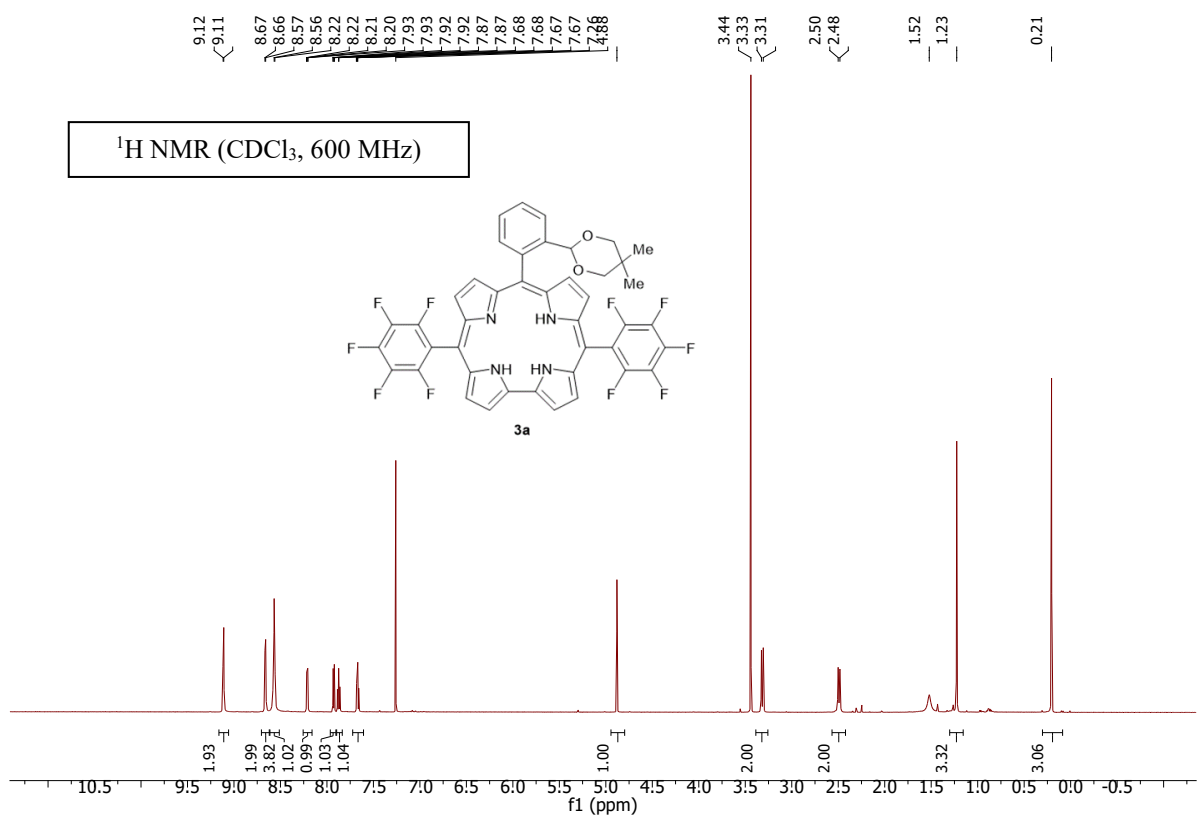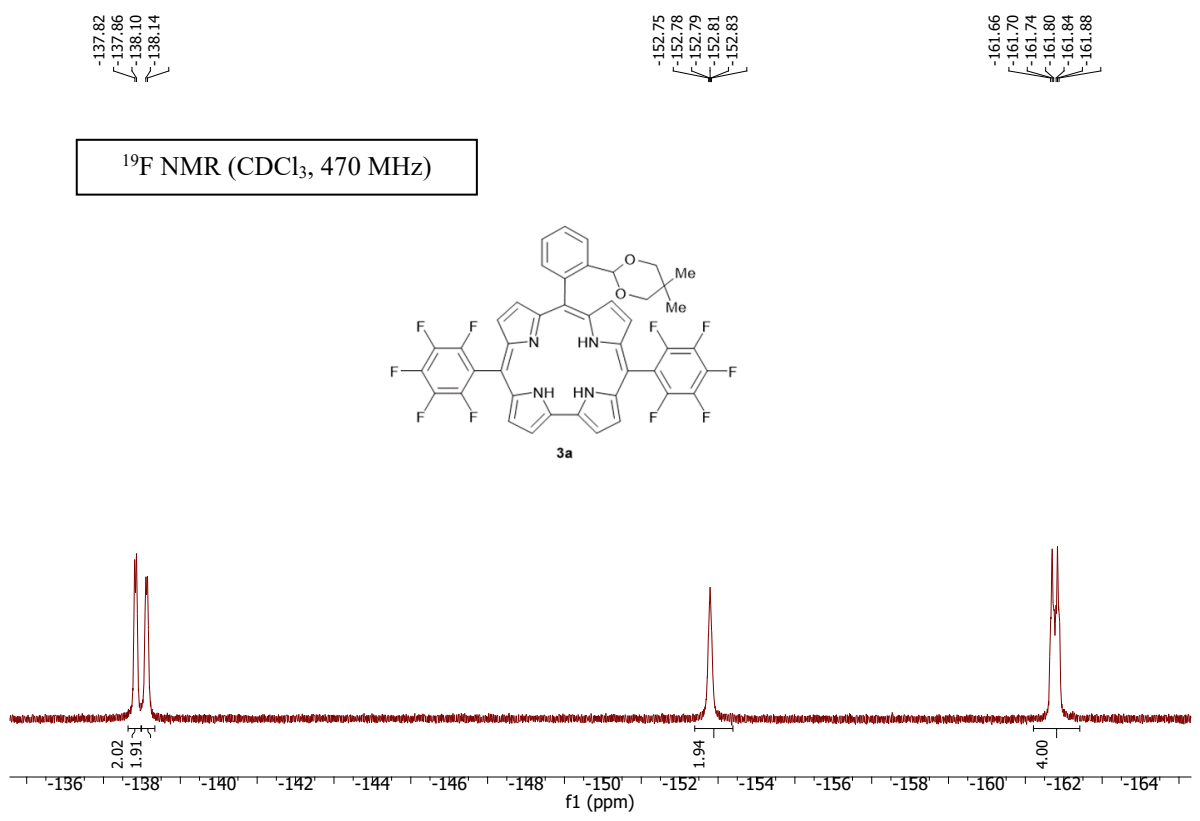

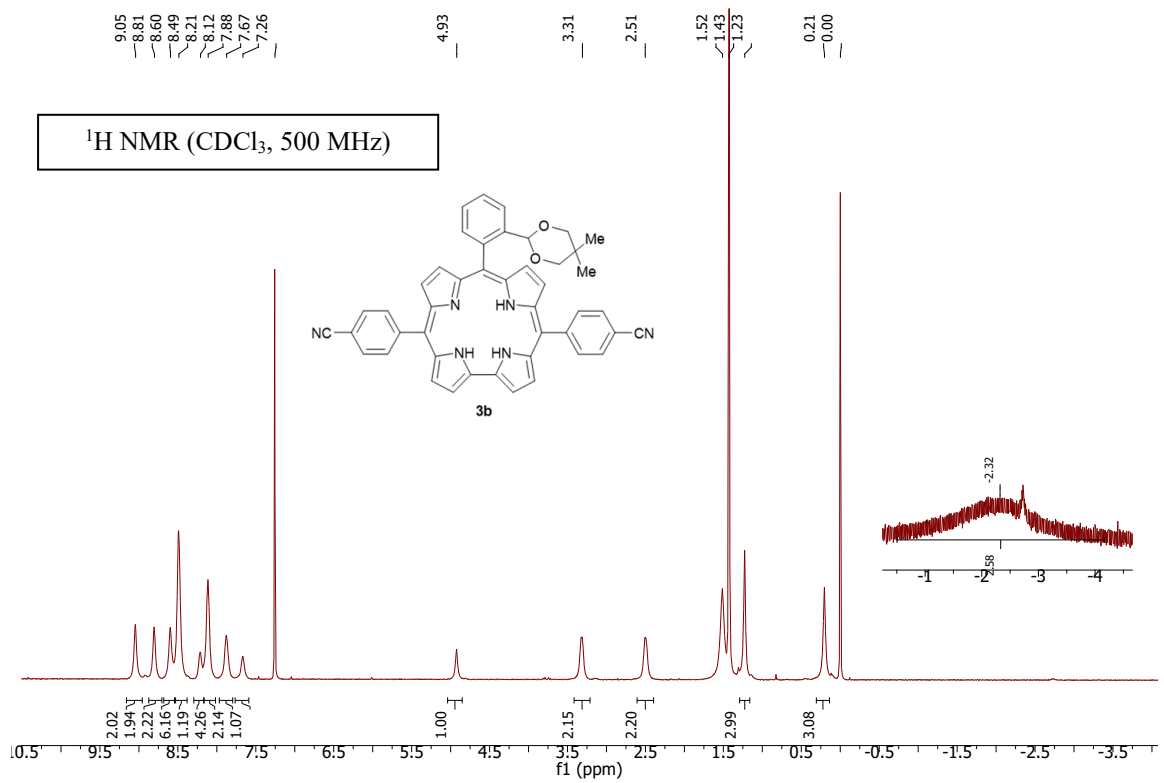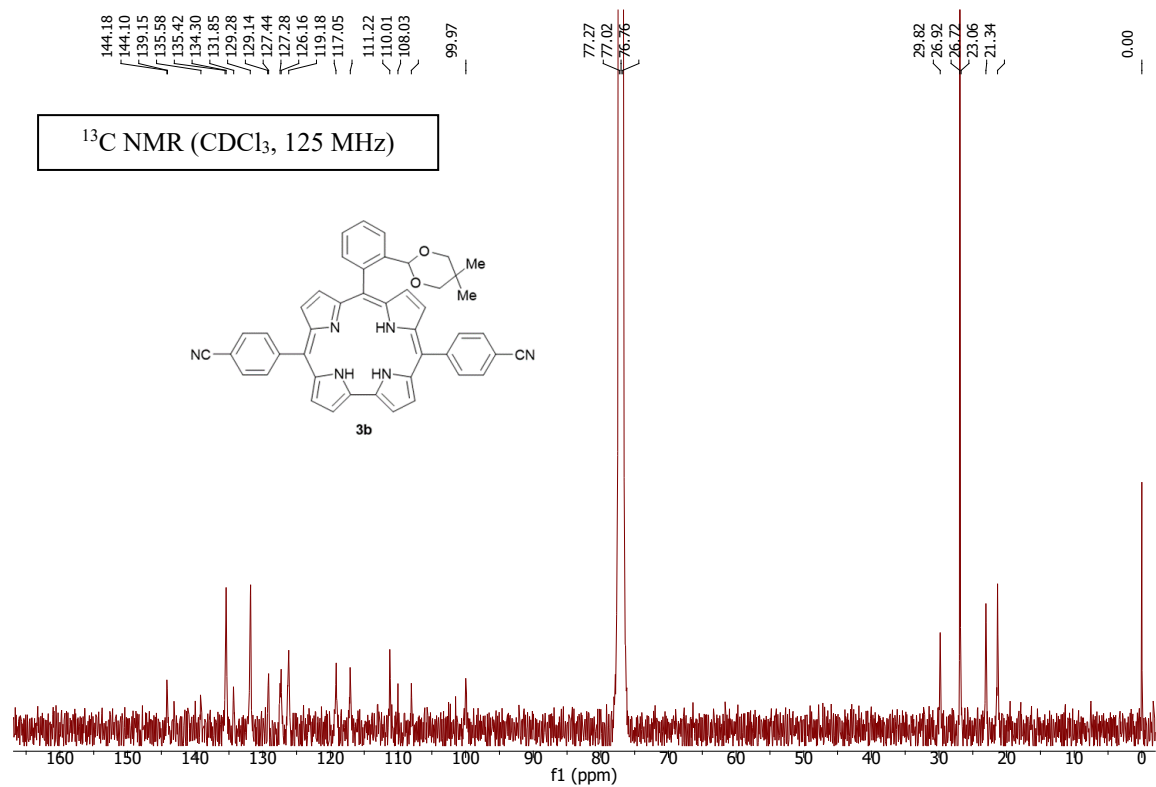

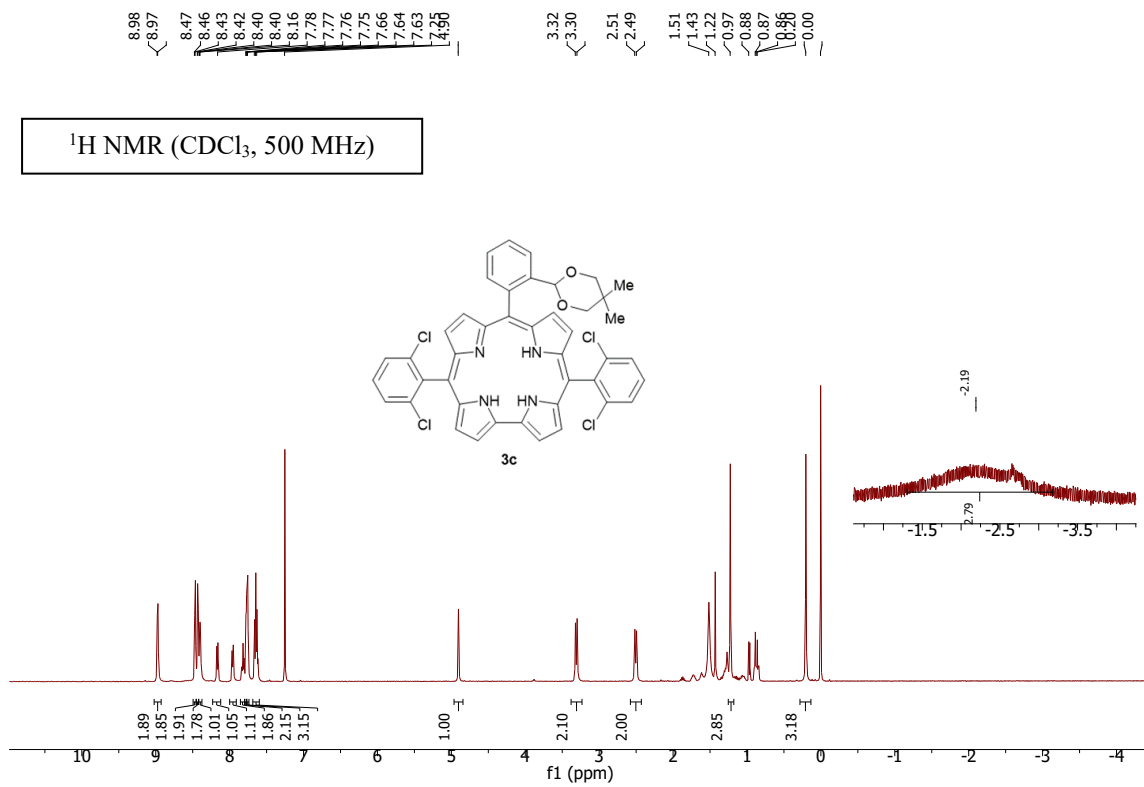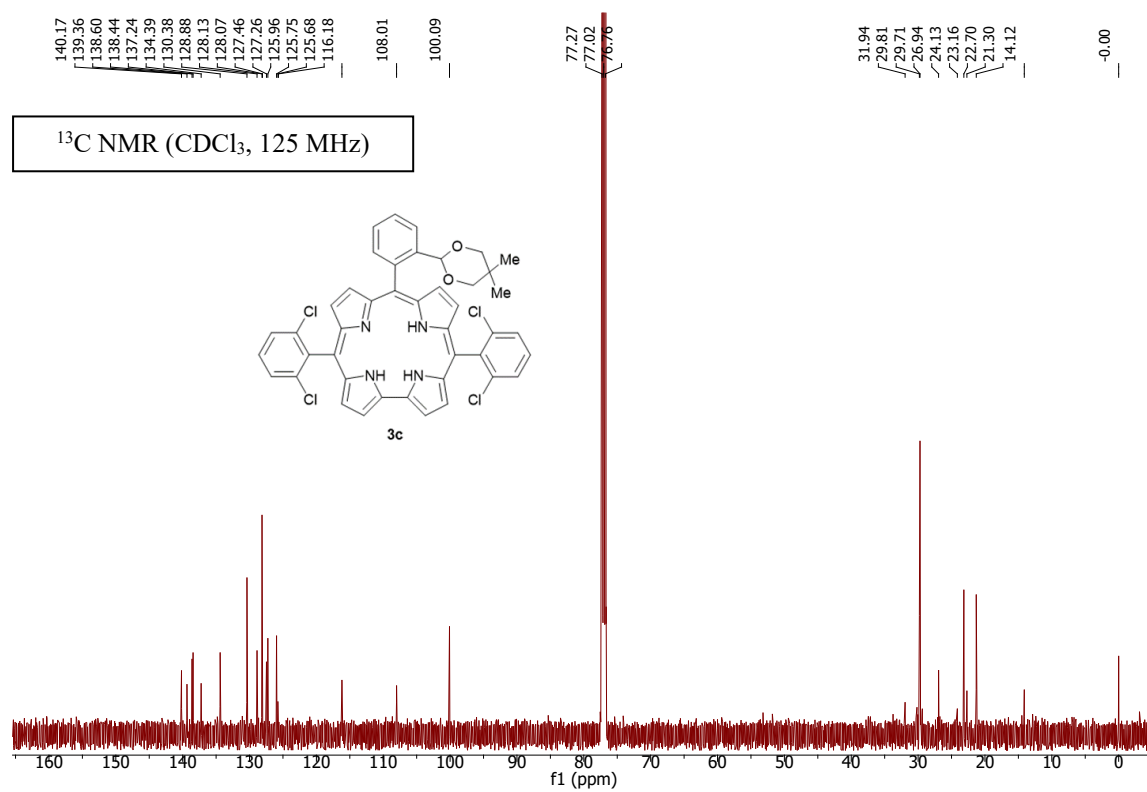

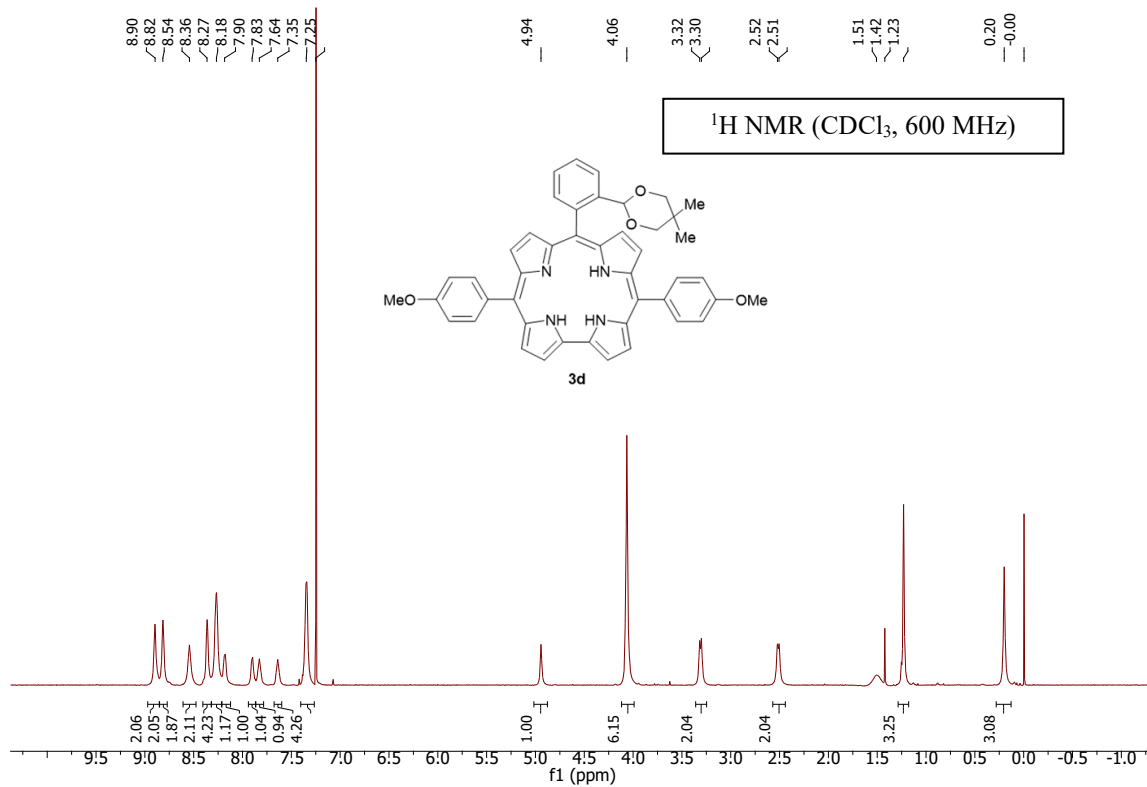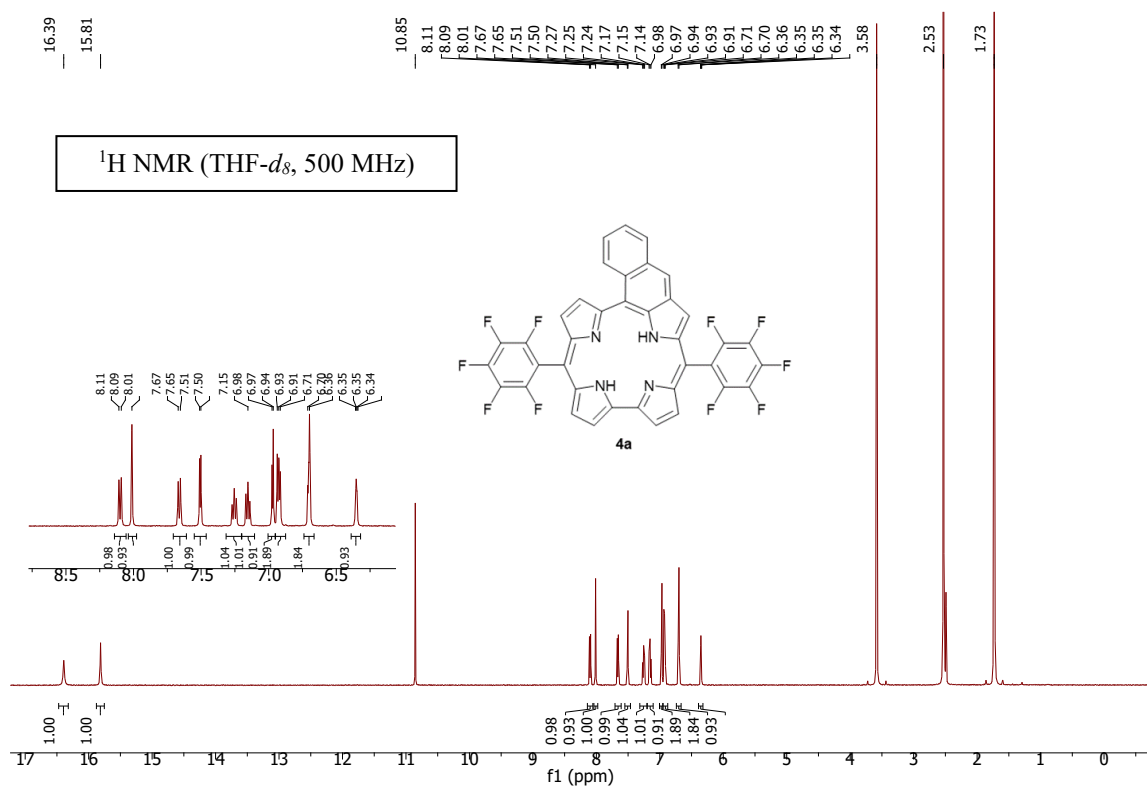

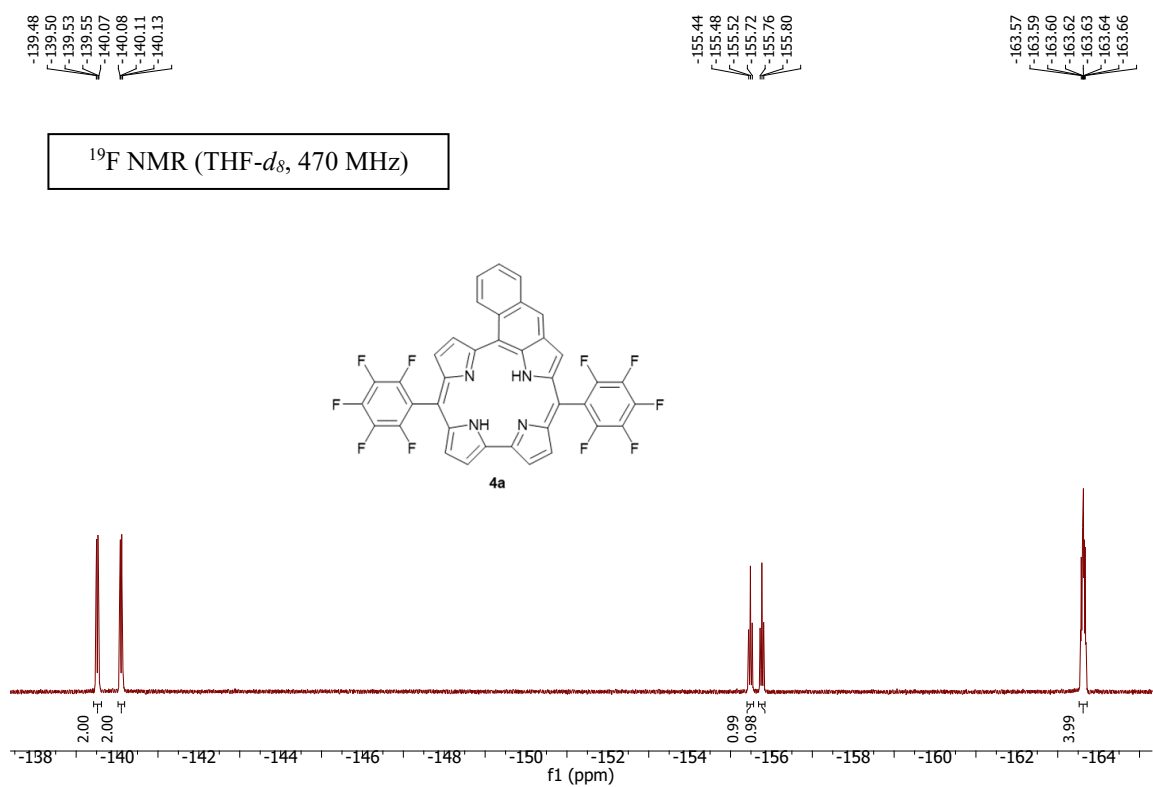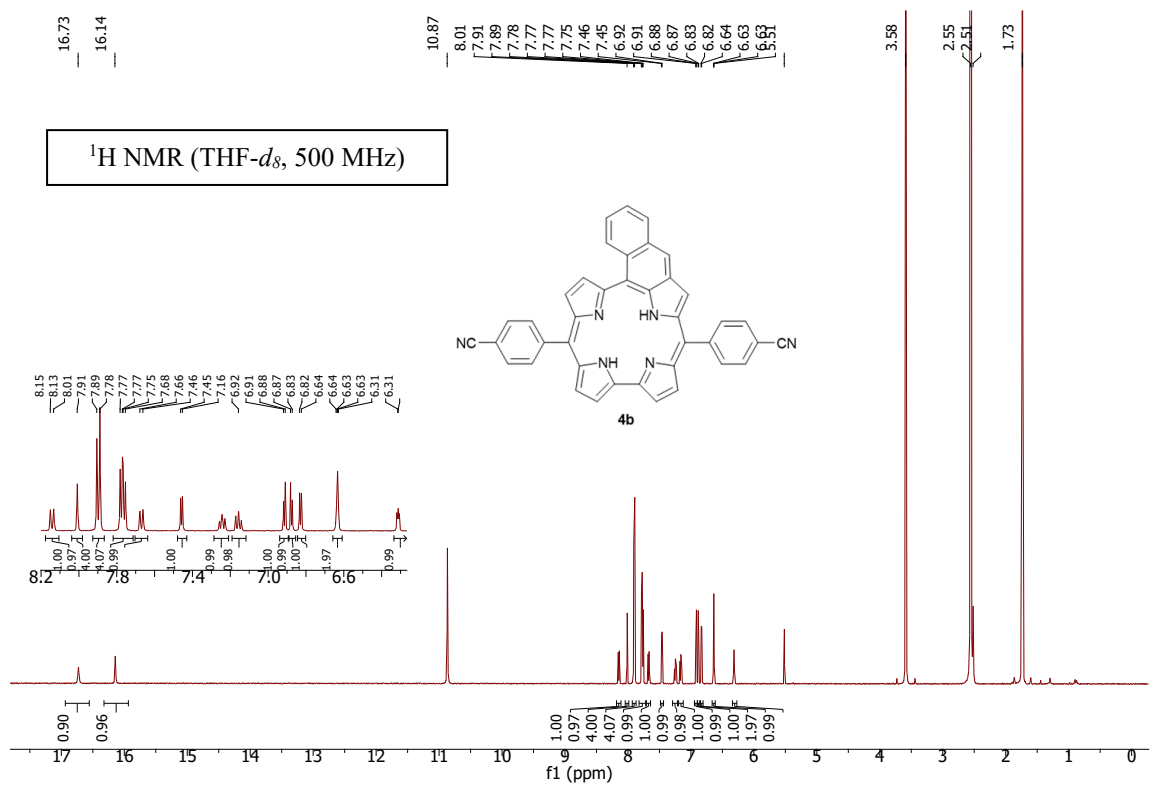

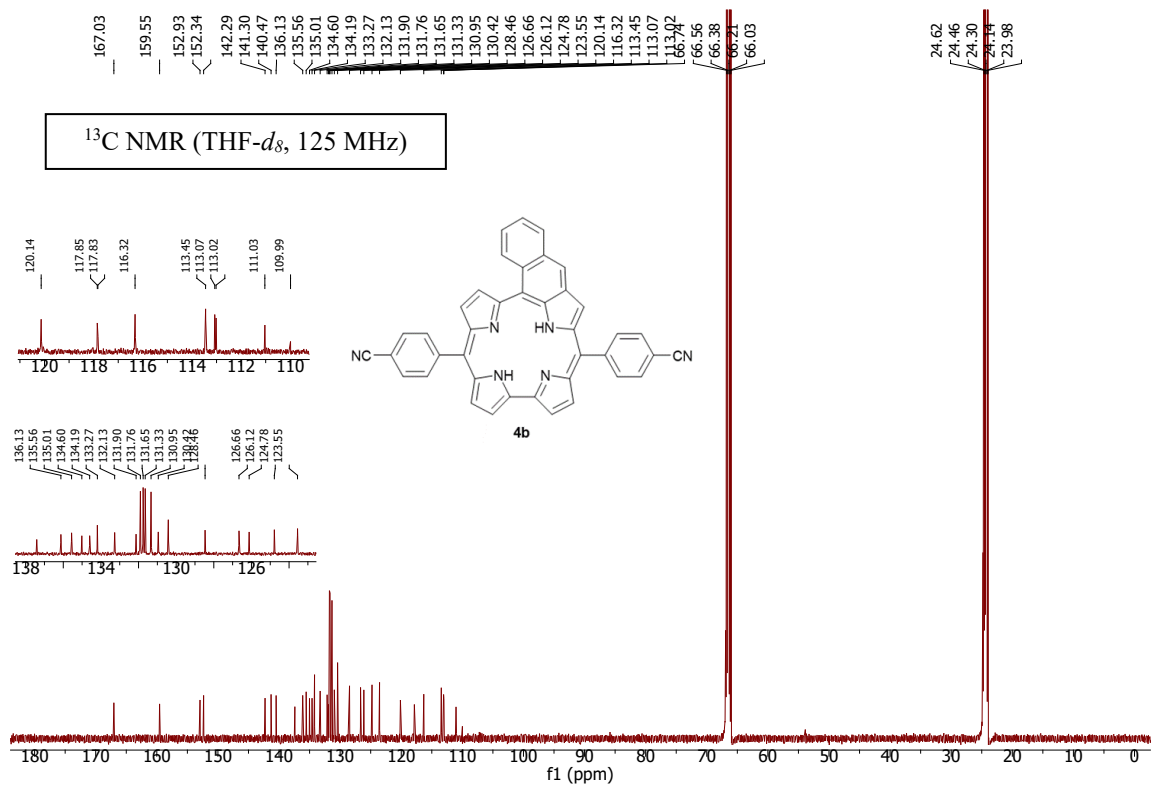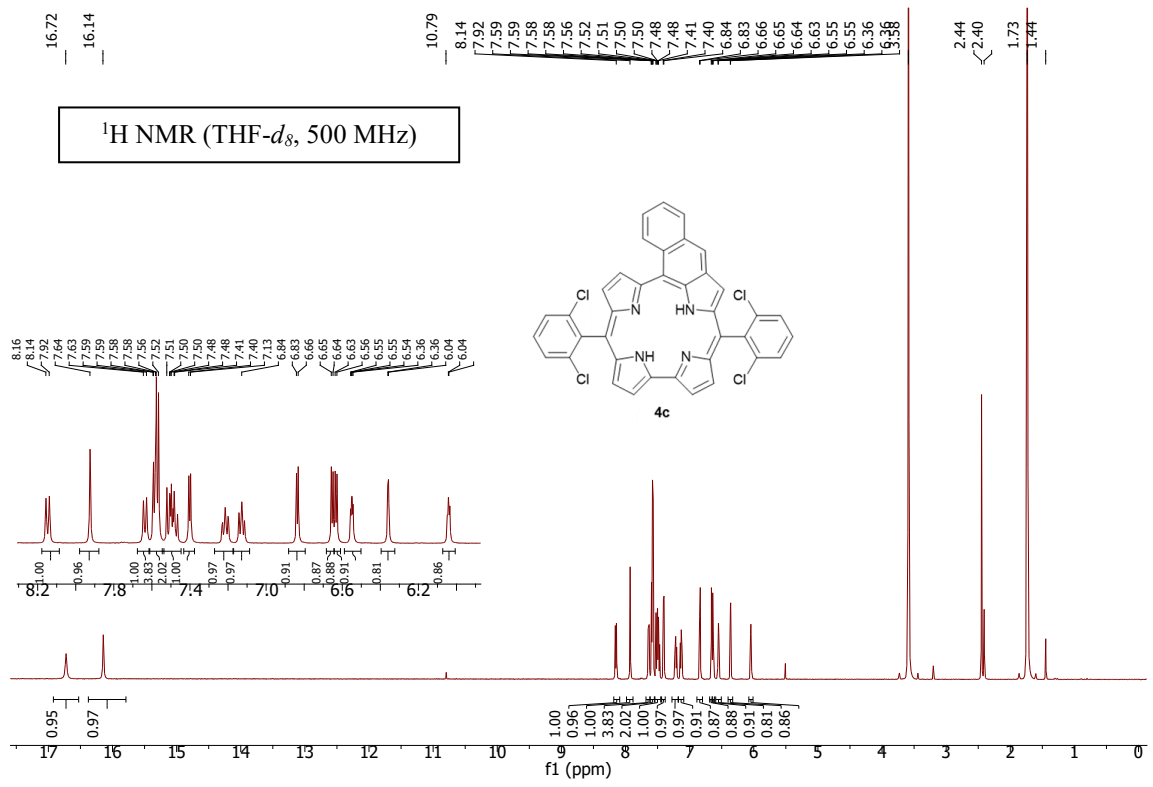



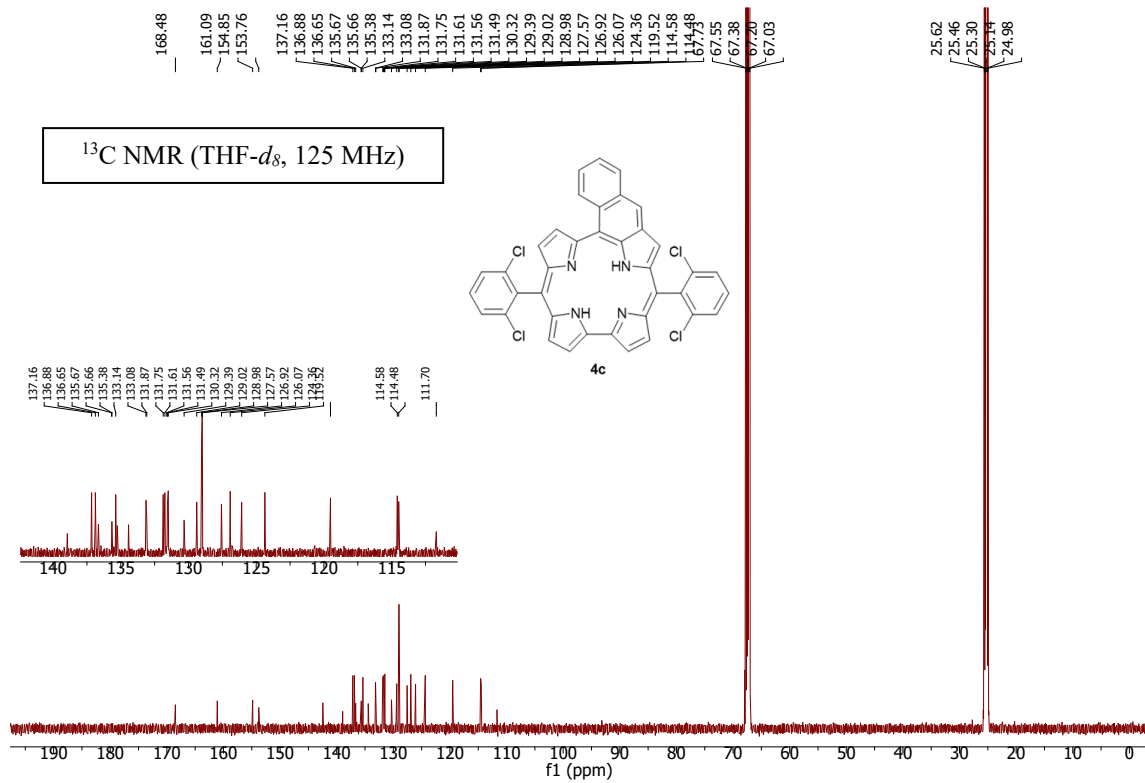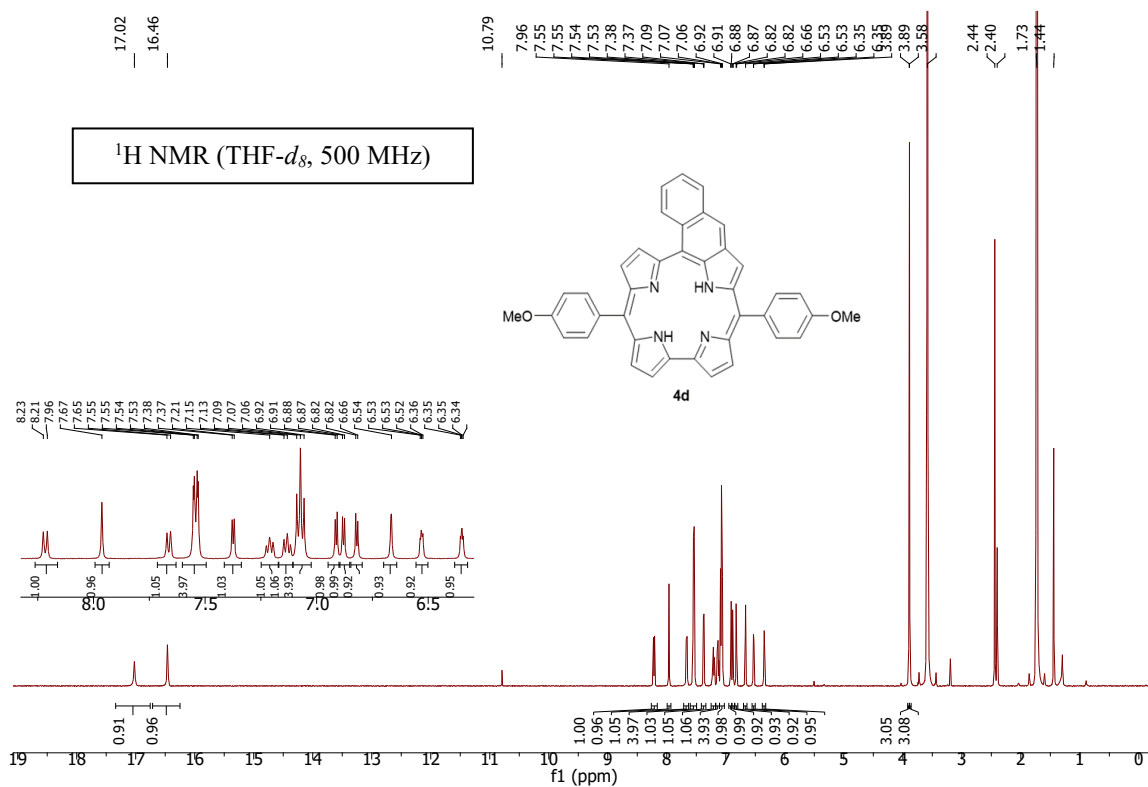

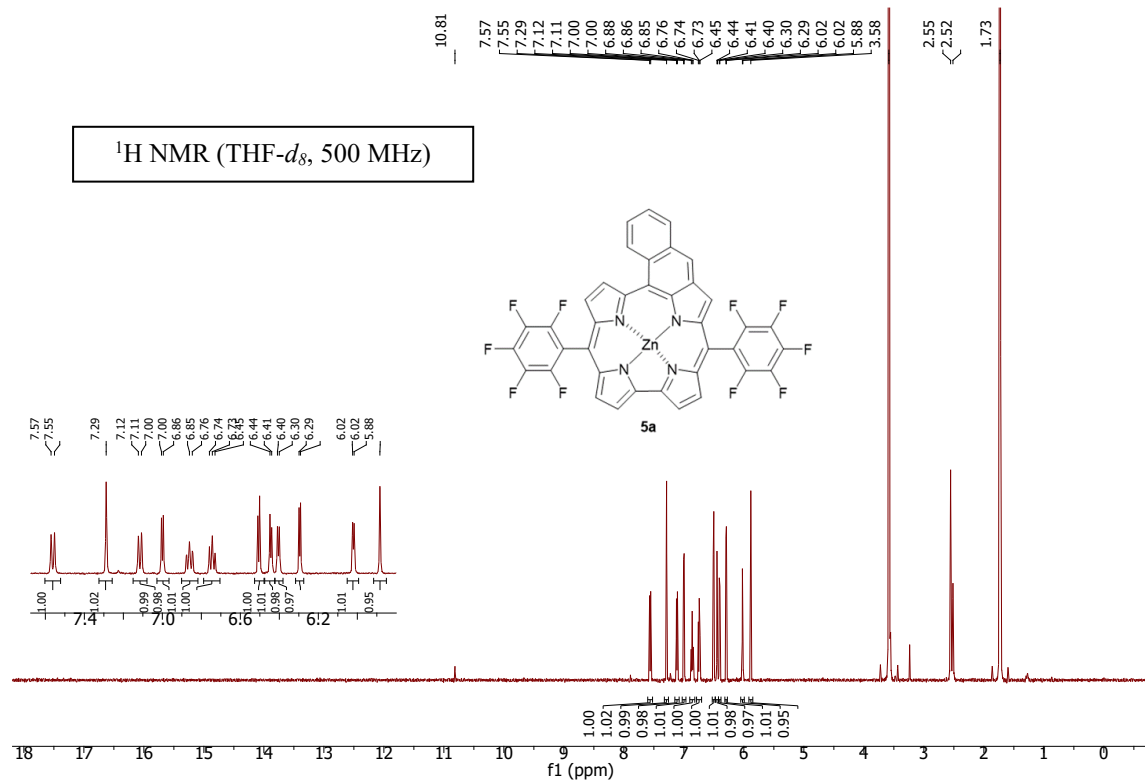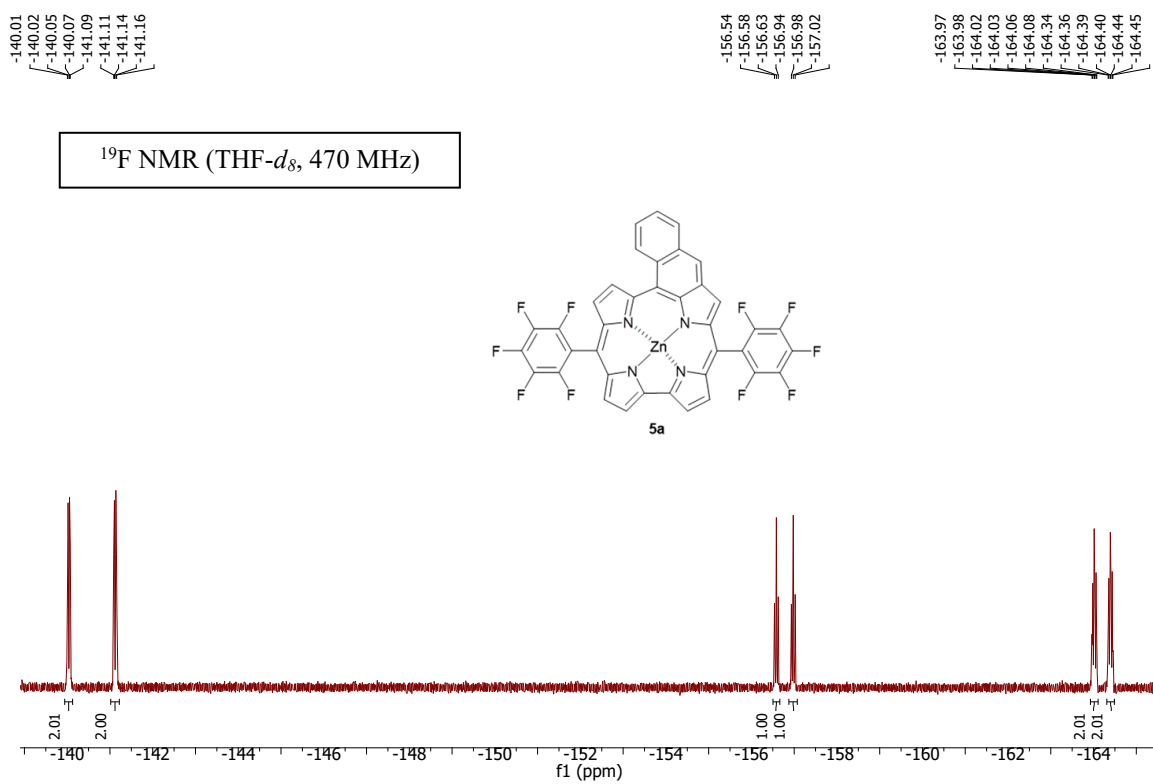

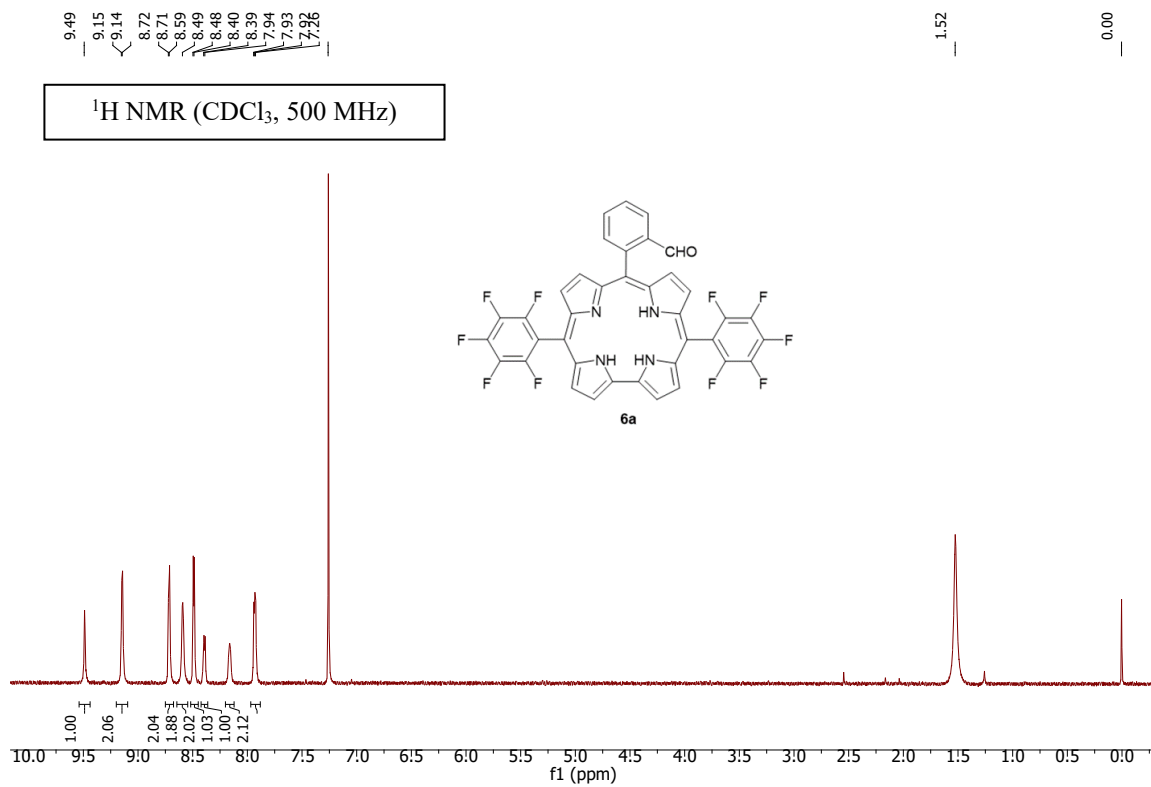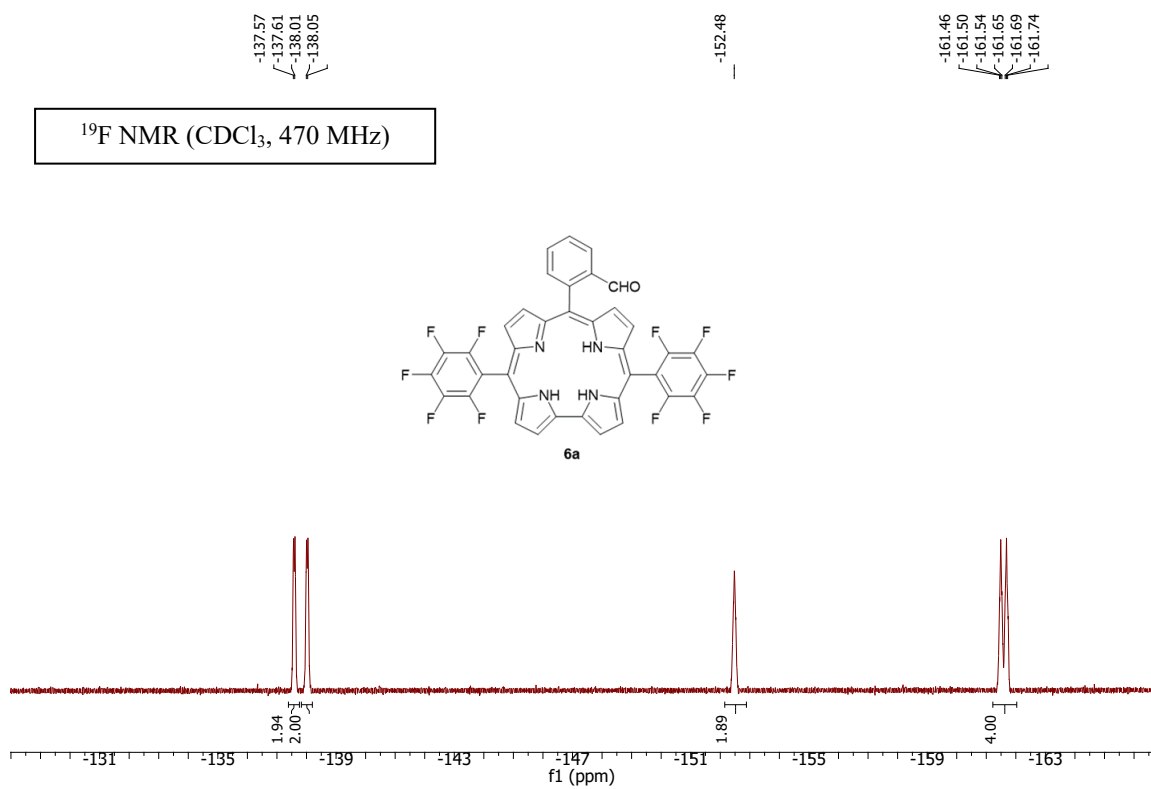

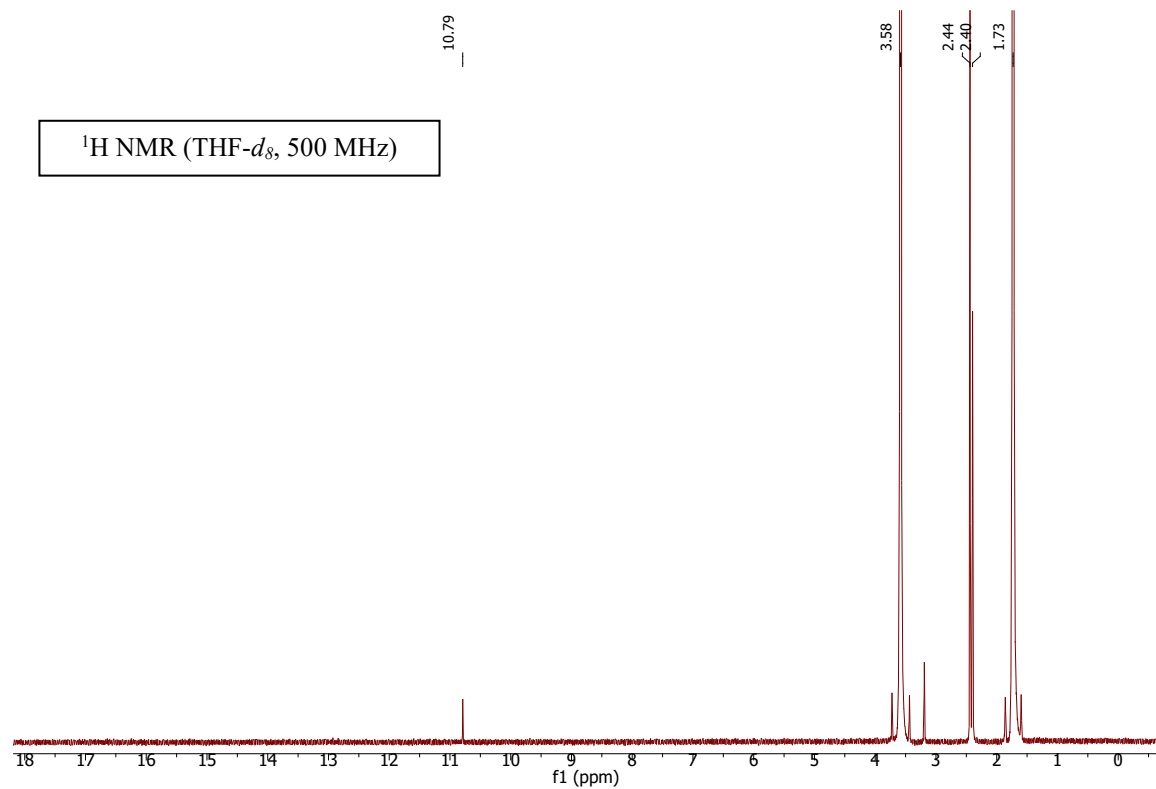

The  $^1\text{H}$  NMR spectrum of pure deuterated THF with additional signals at around 2.5 and 11 ppm.

## 9. Cartesian Coordinates

### 4a

B972/6-31G(d) opt freq scrf=(solvent=chloroform,smd) E=-  
2749.33727902

|   |           |           |           |
|---|-----------|-----------|-----------|
| 7 | 1.255625  | -2.092332 | -0.419046 |
| 7 | 1.465950  | 0.639127  | -0.148347 |
| 7 | -1.481873 | 0.597984  | -0.160778 |
| 7 | -1.366572 | -2.023489 | -0.215871 |
| 6 | 0.629435  | -3.280184 | -0.119616 |
| 6 | 2.587023  | -2.123643 | -0.086525 |
| 6 | 2.810670  | 0.335372  | -0.275187 |
| 6 | 1.227875  | 1.981919  | -0.328113 |
| 6 | -1.286932 | 1.942532  | -0.163142 |
| 6 | -0.788351 | -3.252087 | -0.130877 |
| 6 | -2.837965 | 0.390694  | -0.075896 |
| 6 | 3.376540  | -0.947947 | -0.158370 |
| 6 | -0.032028 | 2.602177  | -0.272243 |
| 6 | 1.626905  | -4.134713 | 0.389059  |
| 6 | 2.828251  | -3.428120 | 0.408355  |
| 6 | -2.721452 | -2.086007 | -0.121484 |
| 6 | 3.452996  | 1.574653  | -0.582146 |
| 6 | 2.504039  | 2.564708  | -0.614692 |
| 6 | -3.458261 | -0.881054 | -0.063799 |
| 6 | -2.563472 | 2.626981  | -0.052137 |
| 6 | -3.522252 | 1.664317  | 0.003886  |
| 6 | -1.851554 | -4.185615 | -0.020474 |
| 6 | -3.041753 | -3.471852 | -0.023497 |
| 1 | 0.778879  | 0.045553  | 0.287861  |
| 1 | 1.460172  | -5.127795 | 0.780259  |
| 1 | 3.767311  | -3.777930 | 0.811438  |
| 1 | 4.505398  | 1.684388  | -0.798370 |
| 1 | -2.709044 | 3.696425  | -0.009375 |
| 1 | -4.588736 | 1.811370  | 0.098244  |
| 1 | -1.739846 | -5.258354 | 0.040022  |
| 1 | -4.037193 | -3.885227 | 0.046425  |
| 6 | -4.938235 | -0.975250 | 0.030182  |
| 6 | -5.570039 | -1.494633 | 1.163021  |
| 6 | -5.767710 | -0.568723 | -1.018207 |
| 6 | -6.952133 | -1.606856 | 1.254113  |
| 6 | -7.152074 | -0.664138 | -0.946885 |
| 6 | -7.746459 | -1.187132 | 0.194640  |
| 6 | 4.847766  | -1.080999 | -0.078013 |
| 6 | 5.598678  | -0.454983 | 0.924271  |
| 6 | 5.561801  | -1.863256 | -0.993793 |
| 6 | 6.979152  | -0.586401 | 1.007038  |
| 6 | 6.940486  | -2.014997 | -0.924118 |
| 6 | 7.653129  | -1.371975 | 0.080362  |
| 9 | 4.994308  | 0.286363  | 1.854817  |
| 9 | 7.657701  | 0.021714  | 1.979946  |

|   |           |           |           |
|---|-----------|-----------|-----------|
| 9 | 8.973885  | -1.508011 | 0.154447  |
| 9 | 7.584253  | -2.760151 | -1.822819 |
| 9 | 4.923460  | -2.479784 | -1.991062 |
| 9 | -7.519396 | -2.103144 | 2.354083  |
| 9 | -9.071007 | -1.285607 | 0.272766  |
| 9 | -7.910937 | -0.268046 | -1.969320 |
| 9 | -5.237550 | -0.075216 | -2.139694 |
| 9 | -4.845229 | -1.896510 | 2.209975  |
| 1 | -0.936762 | -1.093222 | -0.193314 |
| 6 | -0.040511 | 4.092592  | -0.418532 |
| 6 | -0.489507 | 4.656781  | -1.619443 |
| 6 | 0.416777  | 4.958555  | 0.598672  |
| 6 | -0.475490 | 6.035230  | -1.815583 |
| 1 | -0.838981 | 4.002171  | -2.410456 |
| 6 | 0.433998  | 6.344819  | 0.387212  |
| 6 | -0.007938 | 6.885232  | -0.811359 |
| 1 | -0.824301 | 6.445600  | -2.757520 |
| 1 | 0.790546  | 6.981897  | 1.189004  |
| 1 | 0.005856  | 7.958756  | -0.965699 |
| 1 | 0.895332  | -1.449298 | -1.109219 |
| 1 | 2.668454  | 3.604152  | -0.854326 |
| 6 | 0.840777  | 4.444830  | 1.920837  |
| 1 | 0.669445  | 3.369143  | 2.096575  |
| 8 | 1.330384  | 5.139240  | 2.792923  |

**6a**

opt freq 6-31g(d) b972 scrf=(smd,solvent=tetrahydrofuran)  
E=-2672.93884234

|   |           |           |           |
|---|-----------|-----------|-----------|
| 7 | 1.127655  | -1.794006 | -0.443457 |
| 7 | 1.419580  | 0.753477  | 0.027921  |
| 7 | -1.513112 | 0.876405  | -0.224486 |
| 7 | -1.416483 | -1.755885 | -0.698185 |
| 6 | 0.590248  | -2.976863 | -0.673455 |
| 6 | 2.485453  | -1.961919 | -0.331562 |
| 6 | 2.771146  | 0.466612  | 0.074904  |
| 6 | 1.196943  | 2.090417  | 0.077089  |
| 6 | -1.314262 | 2.153119  | 0.093709  |
| 6 | -0.848856 | -2.982665 | -0.760966 |
| 6 | -2.866233 | 0.610285  | -0.012930 |
| 6 | 3.297304  | -0.872987 | -0.072423 |
| 6 | -0.007234 | 2.811200  | 0.028600  |
| 6 | 1.615677  | -4.010360 | -0.729870 |
| 6 | 2.801960  | -3.374432 | -0.520385 |
| 6 | -2.756754 | -1.820281 | -0.538223 |
| 6 | 3.457881  | 1.664440  | 0.224517  |
| 6 | 2.489223  | 2.707176  | 0.211078  |
| 6 | -3.474316 | -0.626187 | -0.210868 |
| 6 | -2.553529 | 2.755702  | 0.582501  |
| 6 | -3.515587 | 1.804653  | 0.486719  |
| 6 | -1.903965 | -3.916044 | -0.716529 |

|   |           |           |           |
|---|-----------|-----------|-----------|
| 6 | -3.093810 | -3.195018 | -0.575565 |
| 1 | 0.742401  | 0.015109  | -0.113684 |
| 1 | 1.457514  | -5.064230 | -0.910560 |
| 1 | 3.786602  | -3.819152 | -0.500031 |
| 1 | 4.526848  | 1.783194  | 0.309158  |
| 1 | -2.664212 | 3.744910  | 0.998118  |
| 1 | -4.554935 | 1.897343  | 0.764955  |
| 1 | -1.802404 | -4.990550 | -0.747782 |
| 1 | -4.087029 | -3.606796 | -0.477681 |
| 6 | -4.941133 | -0.768900 | -0.002624 |
| 6 | -5.512374 | -0.756235 | 1.271544  |
| 6 | -5.800710 | -0.964143 | -1.085989 |
| 6 | -6.881158 | -0.914878 | 1.463589  |
| 6 | -7.171538 | -1.127008 | -0.917260 |
| 6 | -7.711952 | -1.102103 | 0.364123  |
| 6 | 4.765664  | -1.060611 | 0.056935  |
| 6 | 5.317529  | -1.711801 | 1.163114  |
| 6 | 5.651836  | -0.605579 | -0.922979 |
| 6 | 6.689199  | -1.902896 | 1.294477  |
| 6 | 7.026491  | -0.783642 | -0.810631 |
| 6 | 7.545383  | -1.435897 | 0.303097  |
| 9 | 4.528264  | -2.164361 | 2.135724  |
| 9 | 7.185596  | -2.523451 | 2.361811  |
| 9 | 8.856489  | -1.613024 | 0.418738  |
| 9 | 7.845041  | -0.343698 | -1.763239 |
| 9 | 5.187563  | 0.010253  | -2.009208 |
| 9 | -7.397859 | -0.897229 | 2.690239  |
| 9 | -9.020209 | -1.255546 | 0.537388  |
| 9 | -7.966850 | -1.302190 | -1.970044 |
| 9 | -5.314110 | -0.987807 | -2.325829 |
| 9 | -4.745808 | -0.590959 | 2.348313  |
| 1 | -0.927181 | -0.865796 | -0.655068 |
| 6 | 0.136732  | 4.244470  | -0.053602 |
| 6 | -0.932312 | 5.110968  | -0.408459 |
| 6 | 1.426353  | 4.868365  | 0.140474  |
| 6 | -0.782082 | 6.478296  | -0.450198 |
| 1 | -1.880286 | 4.685742  | -0.706425 |
| 6 | 1.537977  | 6.286917  | 0.116044  |
| 6 | 0.458110  | 7.084777  | -0.154862 |
| 1 | -1.627195 | 7.096004  | -0.735707 |
| 1 | 2.515771  | 6.724403  | 0.292695  |
| 1 | 0.559227  | 8.163940  | -0.180112 |
| 6 | 2.584023  | 4.085696  | 0.293749  |
| 1 | 3.544381  | 4.572199  | 0.433242  |

## All-electron OLYP/STO-TZ2P optimized Cartesian coordinates (Å)

### Table of Contents

|                                                 |   |
|-------------------------------------------------|---|
| Table of Contents .....                         | . |
| 1. H <sub>2</sub> (F10BC), C <sub>1</sub> ..... | . |
| 2. Zn(F10BC), C <sub>1</sub> .....              | . |
| 3. Au(F10TPC), C <sub>2v</sub> .....            | . |



1. H<sub>2</sub>(F10BC), C<sub>1</sub>

|   |             |              |              |
|---|-------------|--------------|--------------|
| C | 3.670041000 | 0.274054000  | 5.852143000  |
| C | 3.855176000 | 1.332644000  | 4.964576000  |
| C | 3.873807000 | 9.695744000  | -3.752269000 |
| C | 4.133045000 | 8.843585000  | -2.681292000 |
| C | 4.639165000 | 0.012356000  | 6.819545000  |
| C | 4.789462000 | 10.700026000 | -4.065499000 |
| C | 4.991724000 | 2.146655000  | 5.007644000  |
| C | 5.008784000 | 5.036938000  | 5.899000000  |
| C | 5.039419000 | 9.925187000  | 2.248723000  |
| C | 5.070159000 | 9.877118000  | 0.888375000  |
| C | 5.081893000 | 7.412300000  | 6.892901000  |
| C | 5.135029000 | 6.453930000  | 5.891786000  |
| C | 5.166031000 | 4.603257000  | 4.581825000  |
| C | 5.179763000 | 3.263776000  | 4.054778000  |
| C | 5.292347000 | 8.953550000  | -1.906873000 |
| C | 5.352117000 | 6.860281000  | 4.523128000  |
| C | 5.352279000 | 8.757035000  | 6.575819000  |
| C | 5.362501000 | 3.002201000  | 2.702502000  |
| C | 5.380939000 | 1.743587000  | 1.963065000  |
| C | 5.414265000 | 9.727785000  | 7.614779000  |
| C | 5.469781000 | 8.612123000  | 2.728248000  |
| C | 5.488364000 | 8.537224000  | 0.531116000  |
| C | 5.506628000 | 8.197695000  | 4.126103000  |
| C | 5.543730000 | 8.032298000  | -0.771892000 |
| C | 5.561709000 | 2.069851000  | 0.646321000  |
| C | 5.633065000 | 9.148894000  | 5.208709000  |
| C | 5.641609000 | 5.864536000  | -2.256110000 |
| C | 5.662641000 | 3.523475000  | 0.600506000  |
| C | 5.682950000 | 4.520186000  | -1.870593000 |
| C | 5.717907000 | 6.650276000  | -1.073685000 |
| C | 5.782306000 | 0.807453000  | 6.891520000  |
| C | 5.786640000 | 4.484868000  | -0.458176000 |
| C | 5.809265000 | 11.019931000 | 7.363698000  |
| C | 5.946085000 | 1.855613000  | 5.988852000  |
| C | 5.950112000 | 10.842225000 | -3.306568000 |
| C | 6.115155000 | 10.468046000 | 5.015625000  |
| C | 6.187824000 | 9.972128000  | -2.243982000 |
| C | 6.194957000 | 11.376123000 | 6.052932000  |
| F | 2.567895000 | -0.481840000 | 5.791876000  |
| F | 2.753817000 | 9.566975000  | -4.473304000 |
| F | 2.892000000 | 1.574502000  | 4.066007000  |
| F | 3.217540000 | 7.914213000  | -2.377473000 |
| F | 4.474689000 | -0.998297000 | 7.675803000  |
| F | 4.554008000 | 11.524507000 | -5.089158000 |
| F | 6.715649000 | 0.549015000  | 7.814954000  |
| F | 6.829724000 | 11.804943000 | -3.606449000 |
| F | 7.071897000 | 2.578201000  | 6.063292000  |
| F | 7.321067000 | 10.127624000 | -1.548171000 |
| H | 4.696269000 | 10.743668000 | 2.862712000  |

|   |             |              |              |
|---|-------------|--------------|--------------|
| H | 4.787846000 | 10.655129000 | 0.192722000  |
| H | 4.844213000 | 4.405386000  | 6.758984000  |
| H | 4.876503000 | 7.134120000  | 7.924093000  |
| H | 5.168738000 | 9.410449000  | 8.625892000  |
| H | 5.260041000 | 0.755820000  | 2.386797000  |
| H | 5.485803000 | 5.599994000  | 2.781443000  |
| H | 5.531756000 | 6.248446000  | -3.259915000 |
| H | 5.611294000 | 3.658472000  | -2.519920000 |
| H | 5.618921000 | 1.395432000  | -0.198887000 |
| H | 5.862465000 | 11.749291000 | 8.167521000  |
| H | 5.876326000 | 6.119869000  | 0.917265000  |
| H | 6.471118000 | 10.758846000 | 4.035820000  |
| H | 6.577449000 | 12.375252000 | 5.857316000  |
| N | 5.337772000 | 5.722022000  | 3.781032000  |
| N | 5.548420000 | 4.041598000  | 1.821656000  |
| N | 5.716696000 | 7.793184000  | 1.693006000  |
| N | 5.850793000 | 5.777357000  | -0.044705000 |

## 2. Zn (F10BC), C<sub>1</sub>

|    |             |              |              |
|----|-------------|--------------|--------------|
| Zn | 5.959287000 | 5.935083000  | 1.876146000  |
| C  | 3.637954000 | 9.966289000  | -3.257482000 |
| C  | 3.662864000 | 0.327868000  | 5.668224000  |
| C  | 3.923014000 | 1.377195000  | 4.790039000  |
| C  | 3.980640000 | 9.154749000  | -2.177998000 |
| C  | 4.506784000 | 0.115566000  | 6.756561000  |
| C  | 4.645426000 | 10.494772000 | -4.063415000 |
| C  | 5.023604000 | 7.408370000  | 6.904998000  |
| C  | 5.030385000 | 2.220571000  | 4.944001000  |
| C  | 5.032567000 | 5.059555000  | 5.838189000  |
| C  | 5.149482000 | 6.474996000  | 5.888707000  |
| C  | 5.190449000 | 10.000359000 | 2.250212000  |
| C  | 5.221217000 | 9.896599000  | 0.882244000  |
| C  | 5.295059000 | 8.766402000  | 6.632395000  |
| C  | 5.307443000 | 9.705638000  | 7.699642000  |
| C  | 5.309506000 | 3.316800000  | 3.989719000  |
| C  | 5.310111000 | 8.862066000  | -1.870605000 |
| C  | 5.316589000 | 4.669481000  | 4.517489000  |
| C  | 5.472152000 | 6.904559000  | 4.546040000  |
| C  | 5.478599000 | 1.715965000  | 1.928300000  |
| C  | 5.507590000 | 2.983644000  | 2.646893000  |
| C  | 5.584601000 | 8.269714000  | 4.179245000  |
| C  | 5.586177000 | 8.718008000  | 2.792922000  |
| C  | 5.605431000 | 0.950288000  | 6.951342000  |
| C  | 5.616670000 | 5.876765000  | -2.267940000 |
| C  | 5.618720000 | 8.551871000  | 0.555369000  |
| C  | 5.621924000 | 9.201454000  | 5.287970000  |
| C  | 5.655210000 | 1.999888000  | 0.593472000  |
| C  | 5.659955000 | 7.975473000  | -0.727623000 |
| C  | 5.671293000 | 4.522506000  | -1.955050000 |
| C  | 5.683974000 | 11.013790000 | 7.500545000  |

|   |             |              |              |
|---|-------------|--------------|--------------|
| C | 5.812325000 | 3.436512000  | 0.487060000  |
| C | 5.860014000 | 6.600706000  | -1.048383000 |
| C | 5.862161000 | 1.972751000  | 6.042247000  |
| C | 5.943857000 | 4.434432000  | -0.556105000 |
| C | 5.981513000 | 10.212183000 | -3.783800000 |
| C | 6.061697000 | 10.539866000 | 5.146406000  |
| C | 6.088949000 | 11.419703000 | 6.212377000  |
| C | 6.296640000 | 9.406796000  | -2.691482000 |
| F | 2.356790000 | 10.239620000 | -3.529060000 |
| F | 2.603523000 | -0.467196000 | 5.483661000  |
| F | 2.993350000 | 8.646098000  | -1.427561000 |
| F | 3.058368000 | 1.577300000  | 3.786805000  |
| F | 4.264048000 | -0.882540000 | 7.608427000  |
| F | 4.330847000 | 11.274056000 | -5.101864000 |
| F | 6.410757000 | 0.757669000  | 8.000954000  |
| F | 6.944798000 | 10.719786000 | -4.559915000 |
| F | 6.959964000 | 2.715805000  | 6.234544000  |
| F | 7.587946000 | 9.164224000  | -2.429244000 |
| H | 4.761471000 | 7.109691000  | 7.917966000  |
| H | 4.775521000 | 4.408149000  | 6.660461000  |
| H | 4.857987000 | 10.855155000 | 2.818219000  |
| H | 4.958267000 | 10.662208000 | 0.165655000  |
| H | 5.039165000 | 9.353669000  | 8.693407000  |
| H | 5.329328000 | 0.739953000  | 2.369397000  |
| H | 5.388574000 | 6.312213000  | -3.231681000 |
| H | 5.489071000 | 3.694442000  | -2.628280000 |
| H | 5.674353000 | 1.290454000  | -0.224303000 |
| H | 5.702997000 | 11.717493000 | 8.328474000  |
| H | 6.440972000 | 10.869647000 | 4.188213000  |
| H | 6.449276000 | 12.434066000 | 6.055658000  |
| N | 5.578505000 | 5.803345000  | 3.759731000  |
| N | 5.729398000 | 3.959560000  | 1.718888000  |
| N | 5.842390000 | 7.883360000  | 1.753074000  |
| N | 6.114594000 | 5.694587000  | -0.071648000 |

### 3. Au (F10TPC) , C<sub>2v</sub>

|    |             |             |              |
|----|-------------|-------------|--------------|
| Au | 0.000000000 | 0.000000000 | -0.564480000 |
| C  | 0.000000000 | 0.000000000 | 2.763159000  |
| C  | 0.000000000 | 0.000000000 | 4.251915000  |
| C  | 0.000000000 | 0.000000000 | 7.071163000  |
| C  | 0.000000000 | 0.713333000 | -3.323646000 |
| C  | 0.000000000 | 1.257134000 | 2.127465000  |
| C  | 0.000000000 | 1.828183000 | -4.210501000 |
| C  | 0.000000000 | 2.566292000 | 2.721302000  |
| C  | 0.000000000 | 2.607481000 | -2.054414000 |
| C  | 0.000000000 | 2.790755000 | 0.450296000  |
| C  | 0.000000000 | 2.986181000 | -3.439344000 |
| C  | 0.000000000 | 3.341588000 | -0.848764000 |
| C  | 0.000000000 | 3.492285000 | 1.706134000  |
| C  | 0.000000000 | 4.823898000 | -0.954884000 |

|   |              |              |              |
|---|--------------|--------------|--------------|
| C | 0.000000000  | 7.633064000  | -1.135411000 |
| C | 0.000000000  | -0.713333000 | -3.323646000 |
| C | 0.000000000  | -1.257134000 | 2.127465000  |
| C | 0.000000000  | -1.828183000 | -4.210501000 |
| C | 0.000000000  | -2.566292000 | 2.721302000  |
| C | 0.000000000  | -2.607481000 | -2.054414000 |
| C | 0.000000000  | -2.790755000 | 0.450296000  |
| C | 0.000000000  | -2.986181000 | -3.439344000 |
| C | 0.000000000  | -3.341588000 | -0.848764000 |
| C | 0.000000000  | -3.492285000 | 1.706134000  |
| C | 0.000000000  | -4.823898000 | -0.954884000 |
| C | 0.000000000  | -7.633064000 | -1.135411000 |
| C | 1.192552000  | 0.000000000  | 4.978231000  |
| C | 1.193585000  | 5.545749000  | -1.005514000 |
| C | 1.193585000  | -5.545749000 | -1.005514000 |
| C | 1.207686000  | 0.000000000  | 6.372652000  |
| C | 1.208848000  | 6.936931000  | -1.092600000 |
| C | 1.208848000  | -6.936931000 | -1.092600000 |
| C | -1.192552000 | 0.000000000  | 4.978231000  |
| C | -1.193585000 | 5.545749000  | -1.005514000 |
| C | -1.193585000 | -5.545749000 | -1.005514000 |
| C | -1.207686000 | 0.000000000  | 6.372652000  |
| C | -1.208848000 | 6.936931000  | -1.092600000 |
| C | -1.208848000 | -6.936931000 | -1.092600000 |
| F | 0.000000000  | 0.000000000  | 8.407664000  |
| F | 0.000000000  | 8.966098000  | -1.220864000 |
| F | 0.000000000  | -8.966098000 | -1.220864000 |
| F | 2.364963000  | 4.896120000  | -0.966824000 |
| F | 2.364963000  | -4.896120000 | -0.966824000 |
| F | 2.365049000  | 0.000000000  | 7.043530000  |
| F | 2.365676000  | 0.000000000  | 4.330723000  |
| F | 2.365832000  | 7.607347000  | -1.137187000 |
| F | 2.365832000  | -7.607347000 | -1.137187000 |
| F | -2.364963000 | 4.896120000  | -0.966824000 |
| F | -2.364963000 | -4.896120000 | -0.966824000 |
| F | -2.365049000 | 0.000000000  | 7.043530000  |
| F | -2.365676000 | 0.000000000  | 4.330723000  |
| F | -2.365832000 | 7.607347000  | -1.137187000 |
| F | -2.365832000 | -7.607347000 | -1.137187000 |
| H | 0.000000000  | 1.773619000  | -5.290900000 |
| H | 0.000000000  | 2.755613000  | 3.785299000  |
| H | 0.000000000  | 4.004984000  | -3.801068000 |
| H | 0.000000000  | 4.568957000  | 1.801346000  |
| H | 0.000000000  | -1.773619000 | -5.290900000 |
| H | 0.000000000  | -2.755613000 | 3.785299000  |
| H | 0.000000000  | -4.004984000 | -3.801068000 |
| H | 0.000000000  | -4.568957000 | 1.801346000  |
| N | 0.000000000  | 1.246706000  | -2.054807000 |
| N | 0.000000000  | 1.443686000  | 0.766208000  |
| N | 0.000000000  | -1.246706000 | -2.054807000 |
| N | 0.000000000  | -1.443686000 | 0.766208000  |

## 10. Additional references

- (S1) J. R. Cheeseman, G. W. Trucks, T. A. Keith and M. J. Frisch, *J. Chem. Phys.*, 1996, **104**, 5497-5509.
- (S2) T. A. Keith and R. F. W. Bader, *Chem. Phys. Lett.*, 1993, **210**, 223-231.
- (S3) R. Zanasi, *J. Chem. Phys.* 1996, **105**, 1460-1469.
- (S4) M. W. Lodewyk, M. R. Siebert and D. J. Tantillo, *Chem. Rev.*, 2012, **112**, 1839-1862.
- (S5) R. Gershoni-Poranne and A. Stanger, NICS-Nucleus-Independent Chemical Shift. In *Aromaticity*; Fernandez, I., Ed.; Elsevier, 2021; pp 99-154.
- (S6) T. M. Krygowski, H. Szatyłowicz, O. A. Stasyuk, J. Dominikowska and M. Palusiak, *Chem. Rev.* **2014**, *114*, 6383-6422.
- (S7) T. Lu and F. Chen, *J. Comput. Chem.* **2012**, *33*, 580-592.
- (S8) I. Kaur, W. Jia, R. P. Kopreski, S. Selvarasah, M. R. Dokmeci, Ch. Pramanik, N. E. McGruer, and G. P. Miller, *J. Am. Chem. Soc.*, 2008, **130**, 16274-16286.
- (S9) M. Soltani, R. Minakar, H. R. Memarian, and H. Sabzyan, *J. Phys. Chem. A*, 2019, **123**, 2820-2830.
